## The science of child and adolescent mental health in Brazil: a nationwide systematic review and compendium of evidence-based resources

Lauro Estivalet Marchionatti<sup>1,2</sup> MD, André Cardoso Campello<sup>1,3</sup> MD, Jessica Azevedo Veronesi<sup>1,3</sup> MD Msc, Carolina Ziebold<sup>1,4</sup> PhD, André Comiran Tonon<sup>1,2,5</sup> MD PhD, Caio Borba Casella<sup>1,3</sup> MD, Julia Luiza Schafer<sup>1</sup> PhD, Aaliyah Nadirah Madyun<sup>1</sup> MPA, Arthur Caye<sup>3</sup> MD PhD, Christian Kieling<sup>2</sup> MD PhD, Luis Augusto Rohde<sup>2,6,7</sup> MD PhD, Guilherme V. Polanczyk<sup>3</sup> MD PhD, Jair Mari<sup>3</sup> MD PhD, Rudi Rocha<sup>8,9</sup> PhD, Leonardo Rosa<sup>8</sup> PhD, Dayana Rosa<sup>8</sup> PhD, Zila M Sanchez<sup>4</sup> PhD, Rodrigo A Bressan<sup>4,10</sup> MD PhD, Shekhar Saxena<sup>11</sup> MD, Sara Evans-Lacko<sup>12</sup> MHS PhD, Pim Cuijpers<sup>13</sup> PhD, Kathleen R. Merikangas<sup>14</sup> PhD, Brandon A. Kohrt<sup>15</sup> MD PhD, Jason Bantjes<sup>1,16,17,18</sup> PhD, Shirley Reynolds<sup>1</sup> PhD, Zeina Mneimneh<sup>1,19</sup> PhD, Giovanni Abrahão Salum<sup>1,2</sup> MD PhD

<sup>1</sup> Stavros Niarchos Foundation Global Center for Child and Adolescent Mental Health, Child Mind Institute, New York, NY, United States of America

<sup>2</sup> Department of Psychiatry, Universidade Federal do Rio Grande do Sul, Porto Alegre, RS, Brazil

<sup>3</sup> Department of Psychiatry, Faculty of Medicine, Universidade de São Paulo, São Paulo, SP, Brazil

<sup>4</sup> Department of Psychiatry & Department of Preventive Medicine, Faculty of Medicine, Universidade Federal de São Paulo, São Paulo, SP, Brazil

<sup>5</sup> Department of Psychiatry & Behavioural Neurosciences, McMaster University, Toronto, ON, Canada

<sup>6</sup> Medical Council, Centro Universitário de Jaguariúna & Centro Universitário Max Planck, Jaguariúna & Indaiatuba, SP, Brazil

<sup>7</sup> National Institute of Developmental Psychiatry & National Center for Innovation and Research in Mental Health, São Paulo, SP, Brazil

<sup>8</sup> Instituto de Estudos Para Políticas de Saúde (IEPS), São Paulo & Rio de Janeiro, SP & RJ, Brazil

<sup>9</sup> São Paulo School of Business Administration, Fundação Getúlio Vargas, São Paulo, SP, Brazil

<sup>10</sup> Instituto Ame Sua Mente, São Paulo, SP, Brazil

<sup>11</sup> Department of Global Health and Population, Harvard T H Chan School of Public Health, Boston, MA, United States of America

<sup>12</sup> Care Policy and Evaluation Centre, London School of Economics and Political Science, London, United Kingdom

<sup>13</sup> Department of Clinical Neuro and Developmental Psychology, Vrije Universiteit Amsterdam, Amsterdam, The Netherlands

<sup>14</sup> Genetic Epidemiology Research Branch, National Institute of Mental Health, Bethesda, MD, United States of America

<sup>15</sup> Center for Global Mental Health Equity, Department of Psychiatry and Behavioral Health, School of Medicine and Health Sciences, The George Washington University, Washington, DC, United States

<sup>16</sup> Mental health, Alcohol, Substance use and Tobacco Research Unit, South African Medical Research Council, Cape Town, Western Cape, South Africa

<sup>17</sup> Department of Psychiatry and Mental Health, University of Cape Town, Cape Town, Western Cape, South Africa

<sup>18</sup> Institute for Life Course Health Research, Department of Global Health, Stellenbosch University, Stellenbosch, Western Cape, South Africa

<sup>19</sup> Center for Global Mental Health Equity, University of Michigan, Ann Arbor, MI, United States of America

### Abstract

#### Background

Brazil is home to 50 million children and adolescents, whose mental health needs require context-sensitive research. Although scientific output is growing in the country, publications are scattered and often inaccessible.

#### Methods

This systematic review compiles prevalence estimates, assessment instruments, and interventions for child and adolescent mental health in Brazil (PROSPERO registration: CRD42023491393). We searched international (PubMed, Web of Science, PsycINFO, Google Scholar) and national (SciELO, Lilacs, Brazilian Digital Library of Theses and Dissertations) databases up to July 2024. Reference lists, reviews, and experts were consulted. Extraction followed Consensus-based Standards for the selection of health Measurement Instruments (COSMIN) and Cochrane manuals.

## **Results**

This review appraises 734 studies on 2,576 prevalence estimates, 908 studies on 912 instruments, and 192 studies on 173 intervention trials. Point prevalence of any mental disorder ranged from 10.8% (age 12) to 19.9% (ages 7 to 14), although a nationally-representative study is lacking. There is a rise of self-harm notifications, reaching 133.1 in 2019 (per 100,000 aged 10-19). Indigenous youth face suicide rates of 11 (age 10 to 14), far exceeding national averages (0.652). There is severe violence exposure (21% of adolescents reported domestic physical violence in the previous month), disproportionately impacting Black youth and heightening risks for depression and substance use. Reliable instruments exist for assessing psychopathology, yet most lack psychometric and cross-cultural validation. Interventions remain under-implemented; the largest trials adapted international substance-use prevention programs, showing null effects. High-quality studies are mainly funded by public investment.

## **Discussion**

This compilation provides accessible data for professionals, facilitating translation of science to practice. Brazilian sociocultural challenges impact youth mental health, with public health priorities including violence, systemic racism, and indigenous youth suicide. National research must develop culturally-sensitive resources for mental health, including scalable interventions focused on social minorities.

## **Funding**

The Stavros Niarchos Foundation.

**Keywords:** Child Mental Health, Child Psychiatry, Regional Health Planning, Regional Medical Programs, Systematic Review, Brazil

## Conflicts of interest

**Guilherme V. Polanczyk** has served as a speaker and/or consultant to Abbott, Ache, Adium, Apsen, EMS, Libbs, Medice, Takeda, and receives authorship royalties from Manole Editors.

**Luis Augusto Rohde** has received grant or research support from, served as a consultant to, and served on the speakers' bureau of Abdi Ibrahim, Abbott, Ache, Adium, Apsen, Bial, Cellera, EMS, Knight Therapeutics, Libbs, Medice, Novartis/Sandoz, Pfizer/Upjohn/Viatris, Shire/Takeda, and Torrent in the last three years. The ADHD and Juvenile Bipolar Disorder Outpatient Programs chaired by Dr Rohde have received unrestricted educational and research support from the following pharmaceutical companies in the last three years: Novartis/Sandoz and Shire/Takeda. Dr Rohde has received authorship royalties from Oxford Press and ArtMed.

**Shekhar Saxena** is a senior advisor to McKinsey Health Institute.

**Arthur Caye** served as a consultant for Knight Therapeutics.

**Rodrigo Bressan** received institutional grants, personal fees and non-financial support from Janssen.

**All other authors** declare no conflict of interest.

All declared support occurred outside of the present work.

## Funding

Financial support has been provided by the Stavros Niarchos Foundation (SNF) as part of its Global Health Initiative (GHI) through the SNF Global Center for Child and Adolescent Mental Health at the Child Mind Institute. The funder had no role in the methodology, execution, analyses, or interpretation of the data.

## Acknowledgements

We thank Débora Renata Moura Ramos and Samanta Duarte for designing the flowchart included in this paper.

## Introduction

Brazil, the largest country in the Global South, is home to 50 million children and adolescents, yet this population has been historically neglected by the country's public policies.<sup>1,2</sup> Despite early 21<sup>st</sup>-century growth, the country grapples with severe inequality, high poverty and violence rates, and economic downturns.<sup>3,4</sup> Brazilian youth experience adverse environments, with estimations that approximately 20% of those aged 10 to 19 suffer from a mental disorder.<sup>5-7</sup> The Psychosocial Care Network (“*Rede de Atenção Psicossocial*”, or *RAPS*) addresses this needs, operating as a community-based mental health system within the Brazil's Unified Health System (“*Sistema Único de Saúde*”, or *SUS*).<sup>8</sup> Despite notable achievements, *RAPS* is strained by underfunding, coverage gaps, and quality deficits. The educational system is also critical for mental health, with the 2024 National Policy for Psychosocial Care in School Communities established to address shortages in programs, resources, and specialized staff in public schools.<sup>9</sup>

Mental health practices are inconsistent across the country, with insufficient uptake of clinical guidelines nationally established for the public system.<sup>8</sup> While oriented by international literature and suitably determining pharmacological approaches, these protocols are arguably insufficient to address Brazil's diverse contexts. There is a need for locally-established science and decolonial approaches addressing the unique struggles of Brazilian children and adolescents, including members of indigenous populations, quilombos (communities with a strong African-Brazilian heritage that were originally composed of settlements formed by self-liberated enslaved people), favela residents, and victims of systemic racism.<sup>10-15</sup>

Brazilian science has witnessed significant progress driven by public funding and technological development.<sup>16-18</sup> Since the 2000s, the country has experienced a surge in scientific publications, growing at more than double the international rate.<sup>19,20</sup> This has positioned Brazil as the 13<sup>th</sup> largest global scientific producer, with a notable emphasis on the health field.<sup>21-23</sup> However, impact metrics have not kept pace; citation indexes remain below global and Latin American averages, and many works go uncited.<sup>21,24</sup> The scattered nature of publications highlights weaknesses in scientific communication, lacking cross-referencing essential for advancing knowledge.<sup>25,26</sup> In isolation, articles become costly to locate and appraise, creating an ubiquitous barrier to the uptake of science in practice.

This systematic review aims to identify and appraise prevalence surveys, assessment instruments, and interventions for child and adolescent mental health in Brazil. Our goal is to

create an accessible resource for consulting the evidence base, evaluate the current state of research in the field, and take practical insights for policy.

## Methods

We initially conducted an umbrella search, screening studies into three areas: prevalence estimates, assessment instruments, and interventions. Then, we carried out a three-arm review with specific methods for each topic. Our approach was based on a similar country-wide systematic review in Greece.<sup>27</sup> We followed the Preferred Reporting Items for Systematic Reviews and Meta-Analysis (PRISMA) statement ([Supplementary Table 1](#)) and the PRISMA-COSMIN manual for reporting systematic reviews of measurement instruments.<sup>28,29</sup> Protocol was registered with PROSPERO [CRD42023491393].

### Search strategy

We employed a comprehensive strategy without restrictions of language from inception to July 18th, 2024. Our query associated terms related to mental health, to children and adolescents, and to Brazil, being adapted to English and/or Portuguese according to databases (see [Supplementary Table 2](#)).

The multi-step search procedure consisted of: (1) international databases (PubMed, PsycINFO, and Web of Science); (2) regionally-representative databases (SciELO and Lilacs); (3) Google Scholar; and (4) a national repository of theses and dissertations (*BDTD - Biblioteca Digital Brasileira de Teses e Dissertações*).

This was complemented by: (5) identifying review articles during screening and inspecting their reference lists; (6) snowballing inclusions based on relevant studies; and (7) experts consultation. After extraction, we conducted (8) a specific search on identified gaps (see [Supplementary Table 3](#)).

References were uploaded to *Rayyan*.<sup>30</sup> Studies retrieved in steps 1 and 2 were automatically deduplicated using EPPI-Reviewer 4.0,<sup>31</sup> with a second manually-verified deduplication in *Rayyan*.

## Screening

We conducted primary screening based on title/abstract, categorizing studies into one or more areas: prevalence, instrument, and intervention. Pairs of independent researchers (ACC and CZ; ACT and CBS) performed this initial screening for studies retrieved from the steps 1 and 2. Discrepancies were discussed and resolved by a third reviewer (LEM) when needed. Data sources described in steps 3 and 4 did not allow for exportation and were manually inspected by a single screener (ACC and CZ). In Google Scholar, results were screened until reaching one hundred consecutive studies without novel inclusions. Due to its crawler-based nature, Google Scholar returns overwhelming results and is recommended as a supplementary datasource.<sup>32</sup>

Secondary screening and data extraction were performed independently for each area. These steps were conducted in a single reviewer procedure, with at least 20% of the articles verified by another team member (LEM). This approach was chosen due to the large scope of this review, which prioritized sensitivity over specificity. The team conducted a pilot calibration of inclusion criteria based on at least 10% of the results and held regular discussion meetings.

## Inclusion criteria

We included studies reporting prevalence rates, assessment instruments, or interventions related to child and adolescent mental health outcomes and risk factors (e.g.: includes mental disorders, substance use, suicidality, maltreatment and neglect, bullying, quality of life, wellness, cognitive neurodevelopment, learning difficulties, personality traits, mental health literacy and awareness, and other associated constructs). The eligible population was children/adolescents up to 19 years-old in Brazil (school-based samples with outliers above 19 years old were also eligible), including assessments/interventions involving caregivers/professionals. Research articles, editorial letters with original data, dissertation theses, and book chapters were eligible.

For prevalence studies, we included surveys on community- and school-based samples using structured instruments or epidemiological registers to report prevalence rates or symptom levels.

Instrument studies were included if they developed, translated, or validated assessment instruments (or solely applied the instrument if this was the unique report on that tool).

Intervention studies were included when reporting experimental designs (from pre-post uncontrolled studies to randomized clinical trials (RCTs)) or adaptation/translation of interventions from other settings.

## Exclusion criteria

We excluded multi-country or general population studies that did not disaggregate results between countries or age groups. We excluded studies on neurodevelopmental disorders reporting only motor or phonetic development, on mental health outcomes of caregivers or professionals that do not directly concern children and adolescents (e.g., maternal depression or teacher burnout). Conference abstracts were ineligible.

We excluded prevalence studies on clinical populations (e.g., quality of life among leukemia patients), on populations with very specific determinants (e.g., survivors of traumatic events), reporting the absolute numbers of suicide or violence notifications without populational rates, and datasets with duplicate information (we only included the most comprehensive and/or updated).

Instrument studies were excluded when reporting guides for qualitative interviews, projective tests, or tools assessing quality of life in the context of clinical conditions.

Intervention studies were excluded when reporting case studies or series with fewer than five participants.

## Data extraction and synthesis

### Prevalence studies

Procedures were based on a widely-cited systematic review on the prevalence of child and adolescent mental health disorders.<sup>33</sup> Risk of bias was assessed with a validated tool covering external and internal validity, analysis bias, and representativeness.<sup>34</sup> Each estimate from each study was a separate entry. After extraction, a synthesis table aggregated all estimates per construct.

## Instrument studies

The Consensus-based Standards for the Selection of Health Measurement Instruments (COSMIN) guidelines oriented the extraction, quality assessment, and psychometric evaluation.<sup>35</sup> We employed a three-level procedure encompassing extraction (recording data per each instrument at each study), evaluation summary of its psychometric properties, and synthesis (aggregating data for each instrument) (see details in [Supplementary Table 4](#), [Supplementary Table 5](#) and [Supplementary Table 6](#)).

## Intervention studies

Procedures were based on the Cochrane Manual for Systematic Reviews of Interventions.<sup>36</sup> Methodological quality was assessed with the revised Cochrane tool for randomized trials (RoB 2) and the Joanna Briggs Institute (JBI) tool for non-randomized designs.<sup>37,38</sup>

# Results

We included 734 studies reporting 2576 prevalence estimates, 904 studies reporting 912 unique assessment instruments, and 192 studies reporting 173 trials (see [Figure 1](#) for flowchart; see [Supplementary Table 7](#) for reasons for exclusions). The full dataset can be navigated in [Supplementary File 1](#).

## Overview of scientific production

[Figure 2](#) presents a time trend analysis of publications and topics of inquiry (see heatmap graph in [Supplementary Figure 1](#)). Since 2010, Brazilian scientific production on youth mental health has grown significantly, but intervention intervention studies represent only a tenth of all articles. Studies concentrate on topics such as substance use, psychosocial symptoms, exposure to adversities, and depression. There is significantly less focus on areas specifically relevant to children and adolescents, including Autism Spectrum Disorder (ASD), intellectual disability, and learning disorders. A particularly overlooked domain is sexuality and gender. There are only two works on instruments assessing sexual trajectories discrimination,<sup>39,40</sup> and no reports on gender dysphoria.



[Figure 3](#) shows the regional distribution of prevalence surveys (see heatmap graph in [Supplementary Figure 2](#)). There is a concentration of studies in the historically wealthier and whiter southern and southeastern states, particularly São Paulo (SP) and Rio Grande do Sul (RS). This reflects a centralization of scientific production in specific universities across these regions, with studies usually representing urban populations near these academic centers.

## Prevalence estimates

### Appraisal of the literature

Regarding quality parameters, 517 out of all the 734 studies (70.44%) used probabilistic samples. Most studies on the prevalence of mental disorders relied on screening questionnaires using cutoff points for establishing diagnosis or at-risk population,<sup>41</sup> and only 27 studies (3.68%) employed structured clinical interviews based on standardized diagnostic criteria to confirm diagnoses. Only 69 studies (9.40%) included more than 5,000 participants, and 75 studies (10.22%) recruited participants from all five national regions. Many studies reported small samples from specific locations, with 530 studies (72.21%) recruiting participants from a single state.

There is no nationwide study with clinical interviews on mental disorders prevalence in Brazil, and best evidence is derived from high-quality studies in specific regions. There are nationwide representative surveys on several mental health-related constructs (e.g., substance use, bullying), primarily conducted by governmental entities. Official registers available from the public health system register system (DATASUS) provides nationally-representative data on self-injury notifications, hospitalizations due to psychoactive substances, and rates of violent death.

### Findings

[Table 1](#) selects best-available evidence on the prevalence of mental disorders (see **Supplementary File 1** for full dataset). Current prevalence of any psychiatric diagnosis ranged from 10.8% (at 12 years old in Pelotas, RS) to 19.9% (age 7 to 14, in Porto Alegre, RS, and São Paulo, SP).<sup>42,43</sup>

[Table 2](#) selects nationally representative estimates of mental health-related constructs. Suicide rates per 100,000 indigenous adolescents are alarmingly high (11, age group 10 to 14,

years 2010 to 2015), almost 17 times the equivalent national rate (0.652).<sup>44</sup> Other studies echo these findings: municipalities with a high density of self declared indigenous population presented similar rates (11.6 for children aged 5 to 14),<sup>45</sup> and reports at an indigenous reservation in Dourados (MG) found even higher rates (174 for adolescents aged 14 to 19).<sup>46</sup>

Self-harm notification rates among adolescents have increased markedly, from 15.3 in 2015 to 133.1 in 2019.<sup>47</sup> This is partly attributed to the 2014 policy mandating health notification of self-harm, yet underreporting remains a concern.<sup>48</sup> Substance use is also high, with national surveys in 2019 assessing lifetime alcohol use at 65.15% and illicit drug use at 14.3% for adolescents aged 13 to 17.<sup>49,50</sup> E-cigarette consumption is an emerging concern, with 17.14% lifetime use estimated in 2019.<sup>51</sup>

Exposure to violence remains alarmingly high and associated with adverse mental health outcomes. Nationwide estimates from 2019 indicate substantial rates among adolescents aged 13 to 17, including bullying (40% in the past month), physical domestic violence (21% in the past year), sexual abuse (14.6% lifetime prevalence), missing school due to street insecurity (11.6% in the previous month), and involvement in firearm fights (2.9% in the previous month).<sup>49,52-56</sup>

A racial bias is explicit in the association of violence and mental health. A study of 1,686 adolescents in Rio de Janeiro (RJ) found that those in high-crime areas were at elevated risk for mental disorders, with black adolescents experiencing a stronger association.<sup>57</sup> Another study of 973 adolescents in Salvador (BA) showed that racial discrimination, rather than race itself, was linked to higher rates of depression.<sup>58</sup> Racial-based bullying was associated with increased alcohol and tobacco use among racial minorities,<sup>59</sup> and self-harm rates were higher among black and brown adolescents.<sup>60</sup> Firearm-related death rates reached 10,04 in 2020 (ages 10-14), predominantly composed by homicides of black and brown male youth.<sup>61</sup> Notwithstanding, research focused on black population remains limited, and there are only two studies assessing quilombola mental health.<sup>62,63</sup>

## Assessment instruments

### Appraisal of the literature

Replication issues were evident: 282 (30.92%) out of 912 unique instruments were reported in only one study, and only 20 (2.19%) were featured in more than five studies. Many

studies employed different versions of the same instrument, only validated subscales, or created new instruments instead of existing validated ones.

Psychometric assessment represents a significant quality gap. Positive evidence of internal consistency was reported for 277 instruments (30.37%), construct validity for 112 (12.28%), structural validity for 80 (8.77%), criterion validity for 39 (4.28%), and cross-cultural validity for only 20 tools (2.19%).

Instruments available in Brazil are mostly translations of international tools: 745 instruments (81.69%) were translated from English or other foreign languages. Only 120 of these had at least one validated procedure for translation and cross-adaptation, while the others used free translation or unidentified previous translations. Often, instruments had previous Portuguese versions for adults and were directly validated for children/adolescents without prior adaptation.<sup>64</sup>

There were 167 instruments (18.31%) originally developed in Brazilian Portuguese, and development quality and content validity was considered adequate for only 5 and 4 of those. With few exceptions,<sup>65,66</sup> development of locally-constructed instruments missed essential steps, such as involving patients and professionals in assessing item relevance/comprehensibility.

### **Findings of validation**

[Table 3](#) presents a selection of 14 instruments that were positively validated across at least five psychometric properties (see **Supplementary File 1** for all 991 tools). There are valid, reliable tools for ADHD, anxiety, ASD, or psychosocial functioning, while there are scarcer options for substance use and suicidality.

Only two tools were cross-culturally validated to a native Brazilian language (*Karajá*), the Children Behaviour Checklist (CBCL) and the Teacher Report Form (TRF).<sup>67</sup> The Everyday Discrimination Scale for Adolescents and Adults is the sole tool addressing racism.<sup>40</sup>

## **Interventions**

### **Appraisal of literature**

Psychosocial interventions were reported in 139 studies (72.40%), followed by 30 pharmacological or neuromodulation studies (15.63%), and 22 lifestyle intervention studies (11.46%). School-based programs were reported in 78 studies (40.63%).

RCTs accounted for 90 studies (46.88%), followed by 65 quasi-experimental (33.85%) and 36 uncontrolled pre-post design studies (18.75%). A high risk of bias was observed in 164 studies (90.48%), including 70 RCTs. Large trials were notably lacking, with 139 studies (72.40%) involving fewer than 100 participants.

Interventions generally lacked input from individuals with lived experience, except for the single study focused on quilombolas, which employed a participatory design to develop an alcohol use intervention for adolescents.<sup>68</sup>

Funding sources were predominantly public, reported in 171 studies (89.06%). Considering only RCTs with at least 100 participants, public funding was present in 34 out of 35 studies.

## Findings

[Table 4](#) presents a selection of interventions reported in 35 RCT with more than 100 participants (see **Supplementary File 1** for the full dataset of 192 studies). No large trial has demonstrated an effective universal school or community intervention program ready to scale in Brazil. Some interventions with null effects lacked sufficient sample power to detect outcomes in universal prevention (e.g., PERAE alcohol use prevention program with 348 participants)<sup>69</sup>.

The largest school-based programs focused on substance use prevention, including #TamoJunto, #TamoJunto 2.0, and PROERD (Drug and Violence Resistance Educational Program) which were modeled after the European Unplugged and the USA DARE programs.<sup>70,71</sup> These initiatives were government-endorsed, with nationwide implementation of PROERD, yet analysis showed partial to worsening effects on drug use.<sup>72,73</sup>

There was a single study focusing on quilombola groups,<sup>68</sup> and no interventions specifically addressed the impact of racism on mental health or targeted indigenous mental health.

## Discussion

This systematic review provides a compendium of evidence-based resources on child and adolescent mental health in Brazil. This freely-accessible dataset may facilitate the uptake of evidence-based tools among professionals, further offering a wealth of data for further scholar

research and policymaking. We debate practical insights into the mental health of children and adolescents in Brazil and analyze the current state of national science in this field.

Brazil lacks a nationwide prevalence study on child and adolescent mental disorders as have been conducted in the USA and UK.<sup>74,75</sup> Best available data estimate the prevalence of mental diagnoses comparable to global figures, usually around 13% for age groups from 7 to 11,<sup>42,76-79</sup> yet surveys overly represent samples from south and southeast states. A most alarming finding is the high suicide rate among indigenous children and adolescents, underscoring an urgent public health issue.<sup>44,80</sup> However, mental health research on indigenous youth in Brazil reflects a history of seclusion and remains very restricted.

Brazil's burden of socio-cultural violence profoundly impacts mental health. Children and adolescents facing high rates of severe street, school, domestic, and sexual violence, increasing risks of unfavourable mental health outcomes. Systemic racism underlies many of these associations: racial discrimination, poorer living conditions, and higher exposure to violence place Black youth at elevated risk for depression, self-harm, and substance use. Notably, Brazil has a world-record rate of firearm-related adolescent deaths (10.04 per 100,000), predominantly involving homicides of young Black males.<sup>61</sup> These findings add crucial evidence to the emerging debate on the mental health of Black children and adolescents in Brazil,<sup>81</sup> supporting calls for intervention programs that explicitly incorporate anti-racist goals and culturally-responsive tools tailored to diverse contexts such as quilombola communities.<sup>58,59,63</sup>

Public funding is the primary driver of the scientific production on child and adolescent mental health. Despite growth, concerns about quality and scope persist. Many widely-used international tools lack consistent psychometric and cross-cultural validation, reflecting common challenges in non-English-speaking countries.<sup>27</sup> There are no large-scale trials for anxiety, depression, stress, or bullying as reported across international literature.<sup>82-84</sup> The largest school-based interventions in Brazil have adapted substance-use prevention programs from European and North American interventions, lacking efficacy. Notably, #TamoJunto 2.0 improved cross-cultural adaptation to mitigate harmful effects on alcohol initiation outcomes reported in #TamoJunto 1.0, suggesting the complexity and risk of cultural adaptation of interventions developed in high income countries.<sup>72,85</sup> Improving quality also requires addressing severe replication issues. Mental health publications are numerous but fragmented and uncoordinated, leading to hundreds of duplicated efforts and isolated findings. This compendium aims to

enhance access to appraised and cataloged scientific material, fostering a common language and potentially optimizing resources within the scholarly community.

This broad-scope review adopts a comprehensive search strategy, encompassing a range of databases, snowballing inclusions, expert consultations, and framed search for gaps, without restrictions of time or language. It adheres to evidence synthesis guidelines across three domains, rigorously appraising studies according to established manuals such as Cochrane and COSMIN.<sup>35,36</sup> Our database synthesizes a substantial amount of data in an accessible manner for consultation, potentially representing the largest compilation effort in this field.

We also encountered limitations. The broadness of scope implies that many studies might not be located. As highlighted in COSMIN manual,<sup>35</sup> capturing all data sources for instruments is challenging, and many translations and validations may exist in sources beyond the reach of our search strategy (e.g., books, developer manuals, and websites). Works with relevant information were not included due to age-related inclusion criteria, such as the gender dysphoria prevalence studies that do not discriminate information for participants under 19.<sup>86-89</sup> Most prevalence and intervention studies also reported information on instruments, potentially overrepresenting the latter's numbers in the final aggregation. We only assessed quantitative works. It is important to note that qualitative social and psychosocial research is robust in Brazil and provides culturally-sensitive insights to illuminate quantitative exploration.<sup>90-93</sup>

Brazilian research on child and adolescent mental health misrepresents the country's specific struggles, as it is largely based on international perspectives that are insufficient to address local context.<sup>15</sup> Brazilian specific challenges impact youth's mental health, particularly violence, racism, and indigenous seclusion. As the primary funder of national science, public funding should direct incentives to develop culturally-sensitive assessment and scalable interventions focusing on social minorities.

## References

- 1 Instituto Brasileiro de Geografia e Estatística (IBGE). Censo Demográfico 2022: população por idade e sexo. {Instituto Brasileiro de Geografia e Estatística (IBGE)}, 2023 [https://biblioteca.ibge.gov.br/visualizacao/periodicos/3102/cd\\_2022\\_populacao\\_idade\\_sexo\\_br.pdf](https://biblioteca.ibge.gov.br/visualizacao/periodicos/3102/cd_2022_populacao_idade_sexo_br.pdf).
- 2 Couto MCV, Delgado PGG. Mental health of children and adolescents in the Brazilian public health agenda: late onset and current challenges. *Psicol clín* 2015; **27**: 17-40.
- 3 de Paula LF, Santos F, Moura R. The Developmentalist Project of the PT Governments: An Economic and Political Assessment. *Lat Am Perspect* 2020; **47**: 8-24.
- 4 Junge B, Mitchell ST, Jarrin A, Cantero L. Precarious Democracy: Ethnographies of Hope, Despair, and Resistance in Brazil. Rutgers University Press, 2021.
- 5 Andrade CR de, Avanci JQ, Oliveira R de VC de. Adverse childhood experiences, sociodemographic characteristics, and depressive symptoms in adolescents in a municipality in Rio de Janeiro, Brazil. *Cad Saúde Pública* 2022; **38**: e00269921.
- 6 Komatsu AV, Costa RCS, Buoso FP, Dos Santos PV, Caetano LAO, Bazon MR. Psychosocial adaptation under adverse experiences: A study on the role of empathy with adolescents from vulnerable contexts in Brazil. *Child Abuse Negl* 2024; **150**: 106298.
- 7 Institute for Health Metrics and Evaluation (IHME). Global Burden of Disease (GBD) results. 2021 Global Burden of Disease (GBD) study. 2023. <https://vizhub.healthdata.org/gbd-results/> (accessed 2023).
- 8 Marchionatti LE, Rocha KB, Becker N, Gosmann NP, Salum GA. Mental health care delivery and quality of service provision in Brazil. *SSM - Mental Health* 2023; **3**: 100210.
- 9 Brazilian Government. Law N° 14,819. 2024; published online Jan 16. [https://www.planalto.gov.br/ccivil\\_03/\\_ato2023-2026/2024/lei/L14819.htm](https://www.planalto.gov.br/ccivil_03/_ato2023-2026/2024/lei/L14819.htm).
- 10 Rivera-Segarra E, Mascayano F, Alnasser L, *et al.* Global mental health research and practice: a decolonial approach. *Lancet Psychiatry* 2022; **9**: 595-600.
- 11 Rasheed MA. Navigating the violent process of decolonisation in global health research: a guideline. *Lancet Glob Health* 2021; **9**: e1640-1.
- 12 Chibanda D, Jack HE, Langhaug L, *et al.* Towards racial equity in global mental health research. *Lancet Psychiatry* 2021; **8**: 553-5.
- 13 Naidu T. Says who? Northern ventriloquism, or epistemic disobedience in global health scholarship. *Lancet Glob Health* 2021; **9**: e1332-5.
- 14 Patel V, Saxena S, Lund C, *et al.* Transforming mental health systems globally: principles and policy recommendations. *Lancet* 2023; **402**: 656-66.
- 15 Ortega F, Wenceslau LD. Challenges for implementing a global mental health agenda in Brazil: The 'silencing' of culture. *Transcult Psychiatry* 2020; **57**: 57-70.
- 16 Helene AF, Ribeiro PL. Brazilian scientific production, financial support, established investigators and doctoral graduates. *Scientometrics* 2011; **89**: 677-86.

- 17 Pinheiro R. What are the BRIC countries doing? Research capacity, research output and economic impact. Knowledge production at South African universities: Policies and Practices (forthcoming). 2013; published online Oct 5.  
[https://www.researchgate.net/publication/273799246\\_What\\_are\\_the\\_BRIC\\_countries\\_doing\\_Research\\_capacity\\_research\\_output\\_and\\_economic\\_impact1](https://www.researchgate.net/publication/273799246_What_are_the_BRIC_countries_doing_Research_capacity_research_output_and_economic_impact1).
- 18 McManus C, Baeta Neves AA. Funding research in Brazil. *Scientometrics* 2021; **126**: 801-23.
- 19 Júnior HM, Martelli DR, Silva ACSE, Oliveira MCL, Oliveira EA. Brazil's endangered postgraduate system. *Science* 2019; **363**: 240.
- 20 dos Santos SM. Brazilian universities' performance in international rankings: prominent areas of Brazilian scientific production. 2015; published online April 8. DOI:10.11606/T.27.2015.TDE-26052015-122043.
- 21 Web of Science Group. A Pesquisa no Brasil: Promovendo a excelência. {Clarivate Analytics}, 2019  
<https://propp.ufms.br/files/2019/09/Pesquisa-no-Brasil.pdf>.
- 22 Dias GP. Indicadores cienciométricos na produção científica da medicina brasileira. 2019.  
<https://www.posgraduacao.unimontes.br/uploads/sites/18/2022/09/Disserta%C3%A7%C3%A3o-Gabriela.pdf>.
- 23 de Almeida ECE, Guimarães JA. Brazil's growing production of scientific articles—how are we doing with review articles and other qualitative indicators? *Scientometrics* 2013; **97**: 287-315.
- 24 Santin DM, Vanz SA de S, Stumpf IRC. Internationalization of Brazilian scientific output: policies, strategies and assessment measures. *Revista Brasileira de Pos-Graduacao* 2016; **13**: 81+.
- 25 Sidone OJG. Spatial analysis of scientific production and collaboration networks in Brazil: 1990-2010. 2013. DOI:10.11606/D.12.2013.tde-20012014-155353.
- 26 Cuenca AMB, Barbosa MM de AL, Oliveira K de, Quinta FP, Alvarez M do CA, França I Junior. Uncited articles in Brazilian public health journals. *Rev Saude Publica* 2017; **51**: 114.
- 27 Koumoula A, Marchionatti LE, Caye A, *et al.* The science of child and adolescent mental health in Greece: a nationwide systematic review. *Eur Child Adolesc Psychiatry* 2023; published online May 14. DOI:10.1007/s00787-023-02213-9.
- 28 Page MJ, McKenzie JE, Bossuyt PM, *et al.* The PRISMA 2020 statement: an updated guideline for reporting systematic reviews. *BMJ* 2021; **372**. DOI:10.1136/bmj.n71.
- 29 Elsmann EBM, Mokkink LB, Terwee CB, *et al.* Guideline for reporting systematic reviews of outcome measurement instruments (OMIs): PRISMA-COSMIN for OMIs 2024. *J Patient Rep Outcomes* 2024; **8**: 64.
- 30 Ouzzani M, Hammady H, Fedorowicz Z, Elmagarmid A. Rayyan—a web and mobile app for systematic reviews. *Syst Rev* 2016; **5**: 210.
- 31 Thomas, Brunton, Graziosi. EPPI-Reviewer 4.0: software for research synthesis. *EPPI-Centre Software London* 2010. [https://hero.epa.gov/hero/index.cfm/reference/details/reference\\_id/5915935](https://hero.epa.gov/hero/index.cfm/reference/details/reference_id/5915935).
- 32 Gusenbauer M, Haddaway NR. Which academic search systems are suitable for systematic reviews or meta-analyses? Evaluating retrieval qualities of Google Scholar, PubMed, and 26 other resources.



*Res Synth Methods* 2020; **11**: 181-217.

- 33 Polanczyk GV, Salum GA, Sugaya LS, Caye A, Rohde LA. Annual research review: A meta-analysis of the worldwide prevalence of mental disorders in children and adolescents. *J Child Psychol Psychiatry* 2015; **56**: 345-65.
- 34 Hoy D, Brooks P, Woolf A, *et al.* Assessing risk of bias in prevalence studies: modification of an existing tool and evidence of interrater agreement. *J Clin Epidemiol* 2012; **65**: 934-9.
- 35 Prinsen CAC, Mokkink LB, Bouter LM, *et al.* COSMIN guideline for systematic reviews of patient-reported outcome measures. *Qual Life Res* 2018; **27**: 1147-57.
- 36 Higgins JPT, Thomas J, Chandler J, *et al.* *Cochrane Handbook for Systematic Reviews of Interventions*. John Wiley & Sons, 2019.
- 37 Sterne JAC, Savović J, Page MJ, *et al.* RoB 2: a revised tool for assessing risk of bias in randomised trials. *BMJ* 2019; **366**: 14898.
- 38 Aromataris E, Stern C, Lockwood C, *et al.* JBI series paper 2: tailored evidence synthesis approaches are required to answer diverse questions: a pragmatic evidence synthesis toolkit from JBI. *J Clin Epidemiol* 2022; published online April 14. DOI:10.1016/j.jclinepi.2022.04.006.
- 39 Teixeira-Filho FS, Rondini CA. Ideações e tentativas de suicídio em adolescentes com práticas sexuais hetero e homoeróticas. *Saude soc* 2012; **21**: 651-67.
- 40 Abreu MK de A, Leme VBR, Fernandes LDM, *et al.* Escala de Discriminação Cotidiana para Adolescentes e Jovens: Adaptação e Evidências Psicométricas. *Estud Pesqui Em Psicol* 2022; **22**: 709-28.
- 41 Lopes CS, Abreu G de A, dos Santos DF, *et al.* ERICA: prevalence of common mental disorders in Brazilian adolescents. *Rev Saude Publica* 2016; **50 Suppl 1**: 14s.
- 42 Anselmi L, Fleitlich-Bilyk B, Menezes AMB, Araújo CL, Rohde LA. Prevalence of psychiatric disorders in a Brazilian birth cohort of 11-year-olds. *Soc Psychiatry Psychiatr Epidemiol* 2010; **45**: 135-42.
- 43 Salum GA, Gadelha A, Pan PM, *et al.* High risk cohort study for psychiatric disorders in childhood: rationale, design, methods and preliminary results. *Int J Methods Psychiatr Res* 2015; **24**: 58-73.
- 44 Souza MLP de. Mortality from suicide in indigenous children in Brazil. *Cad Saúde Pública* 2019; **35**: e00019219.
- 45 Orellana JDY, Basta PC, de Souza MLP. Mortality by suicide: a focus on municipalities with a high proportion of self-reported indigenous people in the state of Amazonas, Brazil. *Rev Bras Epidemiol* 2013; **16**: 658-69.
- 46 Lazzarini TA, Gonçalves CCM, Benites WM, *et al.* Suicide in Brazilian indigenous communities: clustering of cases in children and adolescents by household. *Rev Saude Publica* 2018; **52**: 56.
- 47 Pavinati G, Lima LV de, Ribeiro DAC, Bochi CA, De FMM, Tavares MG. Self-harm violence among adolescents in Brazil: evidence of a serious public health problem. *Rev Pesqui Cuid é Fundam Online* DOI:10.9789/2175-5361.rpcf.v15.12761.

- 48 Aragão C de MC de, Mascarenhas MDM. Temporal trend of adolescent intentional self-harm notifications in the school environment, Brazil, 2011-2018. *Epidemiol Serv Saude* 2022; **31**: e2021820.
- 49 Ferreira ACM, da Silva AG, Sá A, *et al.* Risk and protection factors for chronic non-communicable diseases among Brazilian students: 2015 and 2019 National School Health Survey. *REME* 2022; **26**. DOI:10.35699/2316-9389.2022.38620.
- 50 Freitas EA de O, Espinosa MM. Experimentation with Alcohol among Brazilian Adolescents According to the National School Health Survey. *Univ Med* 2024; **65**. DOI:10.11144/Javeriana.umed65.eaab.
- 51 Marmirolli FAP, Garcia VMPS, Fidalgo TM. E-cigarette use in a nationally representative sample of adolescents. *Int J Ment Health Addict* 2024; published online July 12. DOI:10.1007/s11469-024-01363-4.
- 52 Malta DC, Oliveira WA de, Prates EJS, Mello FCM de, Moutinho C dos S, Silva MAI. Bullying among Brazilian adolescents: evidence from the National Survey of School Health, Brazil, 2015 and 2019. *Rev Lat Am Enfermagem* 2022; **30**.
- 53 Malta DC, de Andrade FMD, Ferreira ACM, *et al.* Prevalence of the exposure to situations of violence experienced by Brazilian in-school adolescents. *REME-Revista Mineira de Enfermagem* 2022; **26**. <https://periodicos.ufmg.br/index.php/rem/article/view/38624>.
- 54 Mesas AE, de Andrade SM, Melanda FN, *et al.* Is violence victimization associated with the consumption of ultra-processed food? A population-based study with 96 K adolescent students exploring the mediating role of psychoactive substance use. *Int J Ment Health Addict* 2024; published online Feb 26. DOI:10.1007/s11469-024-01262-8.
- 55 de Vasconcelos NM, de Andrade FMD, Pinto IV, *et al.* Prevalence of sexual violence among schoolchildren in Brazil: Data from the 2019 National School Health Survey. *REME Rev Min Enferm* 2022; **26**. DOI:10.35699/rem.v26i.38473.
- 56 Monte LL, Rufino AC, Madeiro A. Prevalence and factors associated with risky sexual behavior among Brazilian school adolescents. *Cien Saude Colet* 2024; **29**: e03342023.
- 57 Miliauskas CR, Junger W, Hellwig N, Bloch KV, de Souza Lopes C. Community violence in neighborhoods and common mental disorders among Brazilian adolescents. *BMC Psychiatry* 2023; **23**: 772.
- 58 Santana V, Almeida-Filho N, Roberts R, Cooper SP. Skin colour, perception of racism and depression among adolescents in urban Brazil. *Child Adolesc Ment Health* 2007; **12**: 125-31.
- 59 Menezes AAS, Ramos DO, Sanchez ZM, Miskolci R. Racial-based bullying and substance use: A Brazilian national cross-sectional survey among students. *J Racial Ethn Health Disparities* 2023; **10**: 1441-54.
- 60 Bezerra KA, Lima J de S, Tavares G de O, Oliveira VR de, Medeiros SM de, Oliveira JSA de. Prevalence and personal factors associated with self-harm in adolescents. *Cogitare Enferm* 2024; **29**: e92172.
- 61 Degli Esposti M, Coll CVN, Murray J, Carter PM, Goldstick JE. The Leading Causes of Death in

- Children and Adolescents in Brazil, 2000-2020. *Am J Prev Med* 2023; **65**: 716-20.
- 62 Carvalho KCN de. Prevalence of mental disorders in children and adolescents from the Kalunga quilombola community. 2014. <https://repositorio.bc.ufg.br/tede/items/41252ff0-b3b3-4415-96ba-6f6bd9342c21>.
- 63 Goodman R, dos Santos DN, Nunes APR, de Miranda DP, Fleitlich-Bilyk B, Filho NA. The Ilha de Maré study: A survey of child mental health problems in a predominantly African-Brazilian rural community. *Social Psychiatry and Psychiatric Epidemiology: The International Journal for Research in Social and Genetic Epidemiology and Mental Health Services* 2005; **40**: 11-7.
- 64 Passos MHP, Silva HA, Pitangui ACR, Oliveira VMA, Lima AS, Araújo RC. Reliability and validity of the Brazilian version of the Pittsburgh Sleep Quality Index in adolescents □. *J Pediatr* 2017; **93**: 200-6.
- 65 Pondé MP, Wanderley D de B, Menezes LD de, Gomes FL, Siquara GM. A validation study of the LABIRINTO scale for the evaluation of autism spectrum disorder in children aged 2 to 4 years. *Trends Psychiatry Psychother* 2021; **43**: 320-8.
- 66 Galvão Patrícia Paiva de O, Valente Juliana Y, Millon Jacqueline N, *et al.* Validation of a tool to evaluate drug prevention programs among students. *Front Psychol* 2021; **12**. DOI:10.3389/fpsyg.2021.678091.
- 67 Azevêdo PVB, Caixeta LF, Taveira DLR, Giglio MRP, do Rosário MC, Rohde LA. Suggestive diagnosis of attention-deficit/hyperactivity disorder in indigenous children and adolescents from the Brazilian Amazon. *Eur Child Adolesc Psychiatry* 2020; **29**: 373-84.
- 68 Moraes-Partelli AN, Coelho MP, Santos SG, Santos IL, Cabral IE. Participation of adolescents from the Quilombola community in the creation of an educational game about alcohol consumption. *Rev Esc Enferm USP* 2022; **56**: e20210402.
- 69 Amato T de C, Opaleye ES, McBride N, Noto AR. Reducing alcohol-related risks among adolescents: a feasibility study of the SHAHRP program in Brazilian schools. *Cien Saude Colet* 2021; **26**: 3005-18.
- 70 Kreeft PVD, Wiborg G, Galanti MR, *et al.* 'Unplugged': A new European school programme against substance abuse. *Drugs: Education, Prevention and Policy* 2009; **16**: 167-81.
- 71 Singh RD, Jimerson SR, Renshaw T, *et al.* A summary and synthesis of contemporary empirical evidence regarding the effects of the drug abuse resistance education program (D.A.R.E.). *Contemp Sch Psychol* 2011; **15**: 93-102.
- 72 Sanchez Zila M, Valente Juliana Y, Sanudo Adriana, Pereira Ana Paula D, Schneider Daniela Ribeiro, Andreoni Solange. Effectiveness evaluation of the school-based drug prevention program #Tamojunto in Brazil: 21-month follow-up of a randomized controlled trial. *International Journal of Drug Policy* 2018; **60**: 10-7.
- 73 Valente JY, Sanchez ZM. Short-Term Secondary Effects of a School-Based Drug Prevention Program: Cluster-Randomized Controlled Trial of the Brazilian Version of DARE's Keepin' it REAL. *Prev Sci* 2022; **23**: 10-23.
- 74 Ford T, Vizard T, Sadler K, *et al.* Data Resource Profile: Mental Health of Children and Young

- People (MHCYP) Surveys. *Int J Epidemiol* 2020; **49**: 363-4g.
- 75 Merikangas KR, He J-P, Burstein M, *et al.* Lifetime prevalence of mental disorders in U.S. adolescents: results from the National Comorbidity Survey Replication--Adolescent Supplement (NCS-A). *J Am Acad Child Adolesc Psychiatry* 2010; **49**: 980-9.
- 76 Kieling C, Buchweitz C, Caye A, *et al.* Worldwide Prevalence and Disability From Mental Disorders Across Childhood and Adolescence: Evidence From the Global Burden of Disease Study. *JAMA Psychiatry* 2024; published online Jan 31. DOI:10.1001/jamapsychiatry.2023.5051.
- 77 Bauer A, Fairchild G, Hammerton G, *et al.* Associations between childhood trauma and childhood psychiatric disorders in Brazil: a population-based, prospective birth cohort study. *Lancet Psychiatry* 2022; **9**: 969-77.
- 78 Paula CS, Coutinho ES, Mari JJ, Rohde LA, Miguel EC, Bordin IA. Prevalence of psychiatric disorders among children and adolescents from four Brazilian regions. *Braz J Psychiatry* 2015; **37**: 178-9.
- 79 Fleitlich-Bilyk B, Goodman R. Prevalence of child and adolescent psychiatric disorders in southeast Brazil. *J Am Acad Child Adolesc Psychiatry* 2004; **43**: 727-34.
- 80 Glenn CR, Kleiman EM, Kellerman J, *et al.* Annual Research Review: A meta-analytic review of worldwide suicide rates in adolescents. *J Child Psychol Psychiatry* 2020; **61**: 294-308.
- 81 Oliveira CM, Ribeiro LA, Rabelo JL, dos Santos Cunha AP, de Almeida JRJ, Soares J. Impact of racism on the mental health of black children: a literature review. *Brazilian Journal of Health Review* 2021; **4**: 28768-82.
- 82 Brown J, James K, Lisk S, *et al.* Clinical effectiveness and cost-effectiveness of a brief accessible cognitive behavioural therapy programme for stress in school-aged adolescents (BESST): a cluster randomised controlled trial in the UK. *Lancet Psychiatry* 2024; **11**: 504-15.
- 83 Zhang Q, Wang J, Neitzel A. School-based Mental Health Interventions Targeting Depression or Anxiety: A Meta-analysis of Rigorous Randomized Controlled Trials for School-aged Children and Adolescents. *J Youth Adolesc* 2023; **52**: 195-217.
- 84 Fraguas D, Díaz-Caneja CM, Ayora M, *et al.* Assessment of School Anti-Bullying Interventions: A Meta-analysis of Randomized Clinical Trials. *JAMA Pediatr* 2021; **175**: 44-55.
- 85 Sanchez Zila M, Valente Juliana Y, Galvão Patricia P, *et al.* A cluster randomized controlled trial evaluating the effectiveness of the school-based drug prevention program #tamojunto2.0. *Addiction* 2021; : No Pagination Specified - No Pagination Specified.
- 86 Silva DC, Salati LR, Fontanari AMV, *et al.* Prevalence of Gender Dysphoria in Southern Brazil: A Retrospective Study. *Arch Sex Behav* 2021; **50**: 3517-26.
- 87 Soll BMB, Fontanari AM, Brandelli Costa A, *et al.* Descriptive study of transgender youth receiving health care in the gender identity program in southern Brazil. *Front Psychiatry* 2021; **12**. DOI:10.3389/fpsy.2021.627661.
- 88 Bridi Filho CA, Cardoso SB, Soll BMB, *et al.* Descriptive Study of Gender Dysphoria and Sexual Behavior in a Disorder of Sex Development Group. *Front Psychol* 2022; **13**: 652030.

- 89 Nascimento FK, Reis RA, Saadeh A, *et al.* Brazilian transgender children and adolescents: Attributes associated with quality of life. *Rev Lat Am Enfermagem* 2020; **28**: e3351.
- 90 Malta M, Gomes de Jesus J, LeGrand S, *et al.* 'Our life is pointless ... ': Exploring discrimination, violence and mental health challenges among sexual and gender minorities from Brazil. *Glob Public Health* 2020; **15**: 1463-78.
- 91 de Souza Oliveira RM. Quilombos, racismo ambiental e formação em saúde e saúde mental: diálogos emergentes. *ODEERE* 2020; **5**: 129-56.
- 92 Souza J, Lima ALM, Ramos LH, *et al.* Crack e exclusão social. {Ministério da Justiça e Cidadania}, {Secretaria Nacional de Política sobre Drogas}, 2016.
- 93 Kabad JF, Pontes AL de M, Monteiro S. Relações entre produção científica e políticas públicas: o caso da área da saúde dos povos indígenas no campo da saúde coletiva. *Ciênc saúde coletiva* 2020; **25**: 1653-66.
- 94 Gonçalves H, Assunção MC, Wehrmeister FC, *et al.* Cohort profile update: The 1993 Pelotas (Brazil) birth cohort follow-up visits in adolescence. *Int J Epidemiol* 2014; **43**: 1082-8.
- 95 Álvares LGGS, Alves MTSS de B e., Santos AM dos, Oliveira BLCA de, Chagas DC das. Associação entre a violência psicológica e o transtorno de estresse pós-traumático em adolescentes de uma coorte. *Cad Saúde Pública* 2021; **37**: e00286020.
- 96 Simões VMF, Batista RFL, Alves MT, *et al.* Saúde dos adolescentes da coorte de nascimentos de São Luís, Maranhão, Brasil, 1997/1998. *Cad Saude Publica* 2020; **36**. DOI:10.1590/0102-311x00164519.
- 97 Gallo EAG, De Mola CL, Wehrmeister F, Gonçalves H, Kieling C, Murray J. Childhood maltreatment preceding depressive disorder at age 18 years: A prospective Brazilian birth cohort study. *J Affect Disord* 2017; **217**: 218-24.
- 98 Vivian A de S, Rodrigues L, Wendt G, Bicca MG, Braga DT, Cordioli AV. Obsessive-compulsive symptoms and obsessive-compulsive disorder in adolescents: a population-based study. *Braz J Psychiatry* 2014; **36**: 111-8.
- 99 Salum GA, Isolan LR, Bosa VL, *et al.* The multidimensional evaluation and treatment of anxiety in children and adolescents: rationale, design, methods and preliminary findings. *Braz J Psychiatry* 2011; **33**: 181-95.
- 100 Cruzeiro ALS, Silva RA da, Horta BL, *et al.* Prevalência e fatores associados ao transtorno da conduta entre adolescentes: um estudo de base populacional. *Cad Saúde Pública* 2008; **24**: 2013-20.
- 101 Cicogna JIR, Hillesheim D, Hallal AL de LC. Suicide mortality among adolescents in Brazil: increasing time trend between 2000 and 2015. *J Bras Psiquiatr* 2019; **68**: 1-7.
- 102 Crespo KC, Rios AMFM, Martini M, Barcellos C, De Borba Telles LE, Magalhães PVS. Characteristics of suicides of young people in Porto Alegre, Southern Brazil, from 2010 to 2016. *Forensic Sci Med Pathol* 2021; **17**: 596-601.
- 103 Moura Joana Célia Ferreira, Sousa Maria das Graças de Melo, Lima Luisa Helena de Oliveira, Rodrigues Malvina Thaís Pacheco, Mascarenhas Márcio Dênis Medeiros. Tendência de mortalidade por lesões autoprovocadas em adolescentes, 2010 a 2018. *Revista Portuguesa de Enfermagem de*

*Saúde Mental* 2022; : 68-80.

- 104 Fernandes Fabiana Yanes, Freitas Bruna Hinnah Borges Martins de, Marcon Samira Reschetti, *et al.* Suicide trend in Brazilian adolescents between 1997-2016. 2020. DOI:10.1590/SciELOPreprints.964.
- 105 Galvão MTL, Santos MV de DR, Brito LM, *et al.* Hospitalizations for mental and behavioral disorders due to alcohol and other psychoactive substance use among adolescents in Brazil, 2017-2022. *Epidemiol Serv Saude* 2024; **33**: e20231110.
- 106 Mesas AE, González AD, de Andrade SM, Martínez-Vizcaíno V, López-Gil JF, Jiménez-López E. Increased Consumption of Ultra-Processed Food Is Associated with Poor Mental Health in a Nationally Representative Sample of Adolescent Students in Brazil. *Nutrients* 2022; **14**. DOI:10.3390/nu14245207.
- 107 Instituto Brasileiro de Geografia e Estatística, Ministério da Saúde, Ministério da Economia. Pesquisa Nacional de Saúde do Escolar - 2019. Instituto Brasileiro de Geografia e Estatística - IBGE, 2021.
- 108 Antunes JT, Machado ÍE, Malta DC. Risk and protective factors related to domestic violence against Brazilian adolescents. *Rev Bras Epidemiol* 2020; **23 Suppl 1**: e200003.SUPL.1.
- 109 Malta DC, Hallal ALC, Machado ÍE, *et al.* Factors associated with the use of waterpipe and other tobacco products among students, Brazil, 2015. *Rev Bras Epidemiol* 2018; **21**: e180006.
- 110 de Souza ALG, de Almeida AA, Noll PRES, Noll M. Unhealthy life habits associated with self-induced vomiting and laxative misuse in Brazilian adolescents. *Sci Rep* 2021; **11**: 2482.
- 111 Santos MJ, Mascarenhas MDM, Malta DC, Lima CM, Silva MMAD. Prevalence of sexual violence and associated factors among primary school students - Brazil, 2015. *Cien Saude Colet* 2019; **24**: 535-44.
- 112 Silva JL da, Oliveira WA de, Mello FC de M, Prado RR do, Silva MAI, Malta DC. Prevalence of practice of bullying reported by Brazilian students: data from the National School Health Survey, 2015. *Epidemiol Serv Saude* 2019; **28**. DOI:10.5123/s1679-49742019000200005.
- 113 Malta DC, Antunes JT, Prado RR do, Assunção AÁ, Freitas MI de. Factors associated with family violence against adolescents based on the results of the National School Health Survey (PeNSE). *Cien Saude Colet* 2019; **24**: 1287-98.
- 114 Instituto Brasileiro de Geografia e Estatística, Ministério da Saúde, Ministério do Planejamento, Desenvolvimento e Gestão. Pesquisa Nacional de Saúde do Escolar - 2015. Instituto Brasileiro de Geografia e Estatística - IBGE, 2016.
- 115 Malta DC, Prado RR do, Dias AJR, *et al.* Bullying and associated factors among Brazilian adolescents: analysis of the National Adolescent School-based Health Survey (PeNSE 2012). *Rev Bras Epidemiol* 2014; **17**: 131-45.
- 116 Horta RL, Horta BL, da Costa AWN, do Prado RR, Oliveira-Campos M, Malta DC. Lifetime use of illicit drugs and associated factors among Brazilian schoolchildren, National Adolescent School-based Health Survey (PeNSE 2012). *Rev Bras Epidemiol* 2014; **17 Suppl 1**: 31-45.
- 117 Hallal AL de LC, Figueiredo VC, Moura L de, Prado RR do, Malta DC. The use of other tobacco

- products among Brazilian school children (PeNSE 2012). *Cad Saude Publica* 2017; **33Suppl 3**: e00137215.
- 118 Pinto IV, Barufaldi LA, Campos MO, *et al.* Tendências de situações de violência vivenciadas por adolescentes brasileiros: Pesquisa Nacional de Saúde do Escolar 2009, 2012 e 2015. *Rev Bras Epidemiol* 2018; **21**: e180014.
- 119 Oliveira WA de, Silva MAI, Silva JL da, Mello FCM de, Prado RR do, Malta DC. Associations between the practice of bullying and individual and contextual variables from the aggressors' perspective. *J Pediatr (Rio J)* 2016; **92**: 32-9.
- 120 Instituto Brasileiro de Geografia e Estatística, Ministério da Saúde, Ministério da Economia. Pesquisa Nacional de Saúde do Escolar (PeNSE): análise de indicadores comparáveis dos escolares do 9º ano do ensino fundamental - 2009/2019. Instituto Brasileiro de Geografia e Estatística IBGE, 2022.
- 121 Sanchez Zila M, Prado Mariangela Cainelli Oliveira, Sanudo Adriana, Carlini Elisaldo A, Nappo Solange A, Martins Silvia S. Trends in alcohol and tobacco use among Brazilian students: 1989 to 2010. *Revista de Saúde Pública* 2015; **49**. DOI:10.1590/S0034-8910.2015049005860.
- 122 Nappo Solange Aparecida, Sanchez Zila M, Ribeiro Luciana Abeid. Is there a crack epidemic among students in Brazil?: comments on media and public health issues. *Cadernos de Saúde Pública* 2012; **28**: 1643-9.
- 123 Opaleye ES, Ferri CP, Locatelli DP, Amato TC, Noto AR. Nonprescribed use of tranquilizers and use of other drugs among Brazilian students. *Braz J Psychiatry* 2014; **36**: 16-23.
- 124 Zuquette CR, Opaleye ES, Feijó MR, Amato TC, Ferri CP, Noto AR. Contributions of parenting styles and parental drunkenness to adolescent drinking. *Braz J Psychiatry* 2019; **41**: 511-7.
- 125 Tondowski CS, Bedendo A, Zuquette C, Locatelli DP, Opaleye ES, Noto AR. Parenting styles as a tobacco-use protective factor among Brazilian adolescents. *Cad Saude Publica* 2015; **31**: 2514-22.
- 126 Centro Brasileiro de Informações sobre Drogas Psicotrópicas (CEBRID), Universidade Federal de São Paulo (UNIFESP), Secretaria Nacional de Políticas sobre as Drogas (SNPD), Ministério da Justiça. VI Levantamento Nacional sobre o Consumo de Drogas Psicotrópicas entre Estudantes do Ensino Fundamental e Médio das Redes Pública e Privada de Ensino nas 27 Capitais Brasileiras (2010). 2010.
- 127 Coutinho ESF, França-Santos D, Magliano E da S, *et al.* ERICA: patterns of alcohol consumption in Brazilian adolescents. *Rev Saude Publica* 2016; **50 Suppl 1**: 8s.
- 128 Bloch KV, Szklo M, Kuschnir MCC, *et al.* The Study of Cardiovascular Risk in Adolescents--ERICA: rationale, design and sample characteristics of a national survey examining cardiovascular risk factor profile in Brazilian adolescents. *BMC Public Health* 2015; **15**: 94.
- 129 Pan Pedro Mario, Salum Giovanni Abrahão, Gadelha Ary, *et al.* Manic symptoms in youth: Dimensions, latent classes, and associations with parental psychopathology. *J Am Acad Child Adolesc Psychiatry* 2014; **53**: 625-34.
- 130 Cunha Graciele R, Caye Arthur, Pan Pedro, *et al.* Identifying Depression Early in Adolescence: assessing the performance of a risk score for future onset of depression in an independent Brazilian

- sample. *Brazilian Journal of Psychiatry* 2023; **45**: 242-8.
- 131 Salum Giovanni A, Mogg Karin, Bradley Brendan P, *et al.* Association between irritability and bias in attention orienting to threat in children and adolescents. *J Child Psychol Psychiatry* 2017; **58**: 595-602.
  - 132 Hoffmann Mauricio Scopel, Pan Pedro Mario, Manfro Gisele Gus, *et al.* Cross-sectional and longitudinal associations of temperament and mental disorders in youth. *Child Psychiatry Hum Dev* 2019; **50**: 374-83.
  - 133 Simioni André R, Pan Pedro M, Gadelha Ary, *et al.* Prevalence, clinical correlates and maternal psychopathology of deliberate self-harm in children and early adolescents: Results from a large community study. *Rev Bras Psiquiatr* 2018; **40**: 48-55.
  - 134 Munhoz TN, Santos IS, Karam S de M, *et al.* Effect of childhood nutrition counselling on intelligence in adolescence: a 15-year follow-up of a cluster-randomised trial. *Public Health Nutr* 2017; **20**: 2034-41.
  - 135 Pegado Paula, Alckmin-Carvalho Felipe, Leme Danielle, *et al.* Development, applicability and effects of a pilot program of group cognitive-behavioral therapy in Brazilian adolescents with anorexia nervosa. *Eur Arch Psychiatry Clin Neurosci* 2018; **45**: 57-60.
  - 136 Laporte PP, Pan PM, Hoffmann MS, *et al.* Specific and social fears in children and adolescents: separating normative fears from problem indicators and phobias. *Revista brasileira de psiquiatria* 2017; **39**: 118-25.
  - 137 Becker MM, Wagner MB, Bosa CA, *et al.* Translation and validation of Autism Diagnostic Interview-Revised (ADI-R) for autism diagnosis in Brazil. *Arq Neuropsiquiatr* 2012; **70**: 185-90.
  - 138 Becker MM, Bosa C, Oliveira-Freitas VL, *et al.* Improvement of autism spectrum disorder symptoms in three children by using gastrin-releasing peptide. *J Pediatr* 2016; **92**: 302-6.
  - 139 Sousa Filho D de. Evidências de validade convergente para a versão em português da Autism Diagnostic Interview - Revised e o Inventário de Comportamentos Autísticos em uma amostra de crianças e adolescentes de São Paulo. 2014. <http://dspace.mackenzie.br/handle/10899/22552>.
  - 140 Varanda Cristina de Andrade, Fernandes Fernanda Dreux Miranda. Cognitive flexibility training intervention among children with autism: A longitudinal study. *Psicologia: Reflexão e Crítica* 2017; **30**. DOI:10.1186/s41155-017-0069-5.
  - 141 Mattos P, Serra-Pinheiro MA, Rohde LA, Pinto D. A Brazilian version of the MTA-SNAP-IV for evaluation of symptoms of attention-deficit/hyperactivity disorder and oppositional-defiant disorder. *Rev Psiquiatr Rio Gd Sul* 2006; **28**: 290-7.
  - 142 Salum GA, Petersen CS, Jarros RB, *et al.* Group cognitive behavioral therapy and attention bias modification for childhood anxiety disorders: A factorial randomized trial of efficacy. *J Child Adolesc Psychopharmacol* 2018; **28**: 620-30.
  - 143 Tramontina S, Zeni CP, Pheula GF, de Souza CK, Rohde LA. Aripiprazole in juvenile bipolar disorder comorbid with attention-deficit/hyperactivity disorder: an open clinical trial. *CNS Spectr* 2007; **12**: 758-62.
  - 144 von Diemen L, Szobot CM, Kessler F, Pechansky F. Adaptation and construct validation of the



- Barratt Impulsiveness Scale (BIS 11) to Brazilian Portuguese for use in adolescents. *Rev Bras Psiquiatr* 2007; **29**: 153-6.
- 145 Sugaya LS, Kircanski K, Stringaris A, Polanczyk GV, Leibenluft E. Validation of an irritability measure in preschoolers in school-based and clinical Brazilian samples. *Eur Child Adolesc Psychiatry* 2021; : No Pagination Specified - No Pagination Specified.
- 146 Trevisan BT, Dias NM, Berberian A de A, Seabra AG. Childhood Executive Functioning Inventory: Adaptação e Propriedades Psicométricas da Versão Brasileira. *Psico-USF* 2017; **22**: 63-74.
- 147 von Diemen L. Associação entre impulsividade, idade do primeiro consumo de álcool e abuso de substâncias psicoativas em adolescentes de uma região do sul do Brasil. 2006. <http://hdl.handle.net/10183/10073>.
- 148 Trevisan BT. Adaptação e desenvolvimento de instrumentos para avaliação de crianças e adolescentes com TDAH, análise de perfil neuropsicológico e relação com desempenho funcional. 2014. <http://dspace.mackenzie.br/handle/10899/24532>.
- 149 Bandeira ID, Guimarães RSQ, Jagersbacher JG, *et al.* Transcranial direct current stimulation in children and adolescents with attention-deficit/hyperactivity disorder (ADHD): A pilot study. *J Child Neurol* 2016; **31**: 918-24.
- 150 Chazan R, Borowski C, Pianca T, Ludwig H, Rohde LA, Polanczyk G. Do phenotypic characteristics, parental psychopathology, family functioning, and environmental stressors have a role in the response to methylphenidate in children with attention-deficit/hyperactivity disorder? A naturalistic study from a developing country. *J Clin Psychopharmacol* 2011; **31**: 309-17.
- 151 Coelho LF, Barbosa DLF, Rizzutti S, Muszkat M, Bueno OFA, Miranda MC. Use of cognitive behavioral therapy and token economy to alleviate dysfunctional behavior in children with attention-deficit hyperactivity disorder. *Front Psychiatry* 2015; **6**. DOI:10.3389/fpsy.2015.00167.
- 152 Mendes CG. Estudo experimental sobre o efeito do estímulo musical na atenção de crianças e adolescentes com TDAH e com desenvolvimento típico. 2022. <http://hdl.handle.net/1843/46685>.
- 153 Pisacco NMT, Sperafico YLS, Enricone JRB, *et al.* Metacognitive interventions in text production and working memory in students with ADHD. *Psicologia: Reflexão e Crítica* 2018; **31**. DOI:10.1186/s41155-017-0081-9.
- 154 Polanczyk G, Zeni C, P. GJ, *et al.* Association of the adrenergic  $\alpha$ 2A receptor gene with methylphenidate improvement of inattentive symptoms in children and adolescents with attention-deficit/hyperactivity disorder. *Arch Gen Psychiatry* 2007; **64**: 218-24.
- 155 Spaniol MM, Mevorach C, Shalev L, Teixeira MCTV, Lowenthal R, de Paula CS. Attention training in children with autism spectrum disorder improves academic performance: A double-blind pilot application of the computerized progressive attentional training program. *Autism Res* 2021; **14**: 1769-76.
- 156 Sperafico YL, Pisacco NM, Corso L, Rohde LA, Dorneles B. Combined intervention of working memory and arithmetic reasoning in students with ADHD. *International Journal of Disability, Development and Education* 2021; **68**: 566-82.
- 157 Szobot CM, Shih MC, Schaefer T, *et al.* Methylphenidate DAT binding in adolescents with

- Attention-Deficit/Hyperactivity Disorder comorbid with substance use disorder -: a single photon emission computed tomography with [Tc99m] TRODAT-1 study. *Neuroimage* 2008; **40**: 1195-201.
- 158 Szobot CM, Rohde LA, Katz B, *et al.* A randomized crossover clinical study showing that methylphenidate-SODAS improves attention-deficit/hyperactivity disorder symptoms in adolescents with substance use disorder. *Braz J Med Biol Res* 2008; **41**: 250-7.
- 159 Zeni CP, Tramontina S, Ketzer CR, Pheula GF, Rohde LA. Methylphenidate combined with aripiprazole in children and adolescents with bipolar disorder and attention-deficit/ hyperactivity disorder: A randomized crossover trial. *J Child Adolesc Psychopharmacol* 2009; **19**: 553-61.
- 160 Lúcio PS, Eid M, Cogo-Moreira H, Puglisi ML, Polanczyk GV. Investigating the Measurement Invariance and Method-Trait Effects of Parent and Teacher SNAP-IV Ratings of Preschool Children. *Child Psychiatry Hum Dev* 2022; **53**: 489-501.
- 161 Trevisan BT, Berberian AA, Dias NM, Roama-Alves RJ, Seabra AG. Development and psychometric properties of the Difficulties in Executive Functions, Regulation and Delay Aversion Inventory - Version for children and adolescents. *Rev Aval Psicol* 2022; **21**: 261-72.
- 162 Moraes PCB, Damásio BF, Lima GCMDE, Sudo FK, Mattos PELDE. Parent-teacher report reliability on the fourth edition of the Swanson, Nolan and Pelham scale in a Brazilian clinical sample of children and adolescents with attention-deficit/hyperactivity disorder. *Rev Psiquiatr Clin* 2020; **47**: 35-9.
- 163 Serra-Pinheiro MA, Mattos P, Regalla MA. Inattention, hyperactivity, and oppositional--Defiant symptoms in Brazilian adolescents: Gender prevalence and agreement between teachers and parents in a non-English speaking population. *J Atten Disord* 2008; **12**: 135-40.
- 164 Rafihi-Ferreira RE, Lewis KM, McFayden T, Ollendick TH. Predictors of nighttime fears and sleep problems in young children. *J Child Fam Stud* 2019; **28**: 941-9.
- 165 Nunes SAN, Faraco AMX, Vieira ML. Attachment and parental practices as predictors of behavioral disorders in boys and girls. *Paid (Ribeirão Preto)* 2013; **23**: 369-78.
- 166 Rohde Luis Augusto, Biederman Joseph, Knijnik Marcia P, *et al.* Exploring different information sources for DSM-IV ADHD diagnoses in Brazilian adolescents. *J Atten Disord* 1999; **3**: 91-6.
- 167 Fernandes LFB, Luiz AMAG, Miyazaki MC de OS, Marques Filho AB. Effects of a group counseling program for caregivers of children with psychiatric disorders. *Estudos de Psicologia* 2009; **26**: 147-58.
- 168 Bordin I, Mari J, Caeiro MF. Validation of the Brazilian version of the Child Behavior Checklist (CBCL): preliminary data. *Associação Brasileira de Psiquiatria and Asociación Psiquiátrica de América Latina* 1995; **17**: 55-66.
- 169 Borsa JC, Bandeira DR. The Peer Aggressive and Reactive Behaviors Questionnaire (PARB-Q): evidence of validity in the Brazilian context. *Trends in psychiatry and psychotherapy* 2014; **36**: 89-100.
- 170 Rivero LMHN, Andrade ALM, Figueredo LZP, Pinheiro BO, Micheli D. Evaluation of FunFRIENDS program in prevention of anxiety in Brazilian children: a randomized controlled pilot trial. *Cien Saude Colet* 2020; **25**: 4497-508.

- 171 Magalhães Sabrina de Sousa, Miranda Diana Kraiser, Paula Jonas Jardim de, Miranda Débora Marques de, Romano-Silva Marco Aurélio, Malloy-Diniz Leandro Fernandes. Psychometric properties of a Brazilian Portuguese version of the Children's Revised Impact of Event Scale (CRIES-8). *Eur Arch Psychiatry Clin Neurosci* 2018; **45**: 27-32.
- 172 Borba BMR. Problemas emocionais e de comportamento e rendimento escolar: Avaliação de adolescentes, pais e professores. 2016.  
<http://www.repositorio.jesuita.org.br/handle/UNISINOS/10136>.
- 173 de Oliveira Pires Thiago, da Silva Cosme Marcelo Furtado Passos, de Assis Simone Gonçalves. Association between family environment and attention deficit hyperactivity disorder in children—Mothers' and teachers' views. *BMC Psychiatry* 2013; **13**.
- 174 Anselmi Luciana, Barros Fernando C, Teodoro Maycoln L. M, *et al*. Continuity of behavioral and emotional problems from pre-school years to pre-adolescence in a developing country. *J Child Psychol Psychiatry* 2008; **49**: 499-507.
- 175 Sabrina de Sousa Magalhães. Desastres decorrentes de eventos climáticos extremos: impacto na saúde mental e acompanhamento prospectivo de sintomas em crianças e adolescentes. 2019.  
<http://hdl.handle.net/1843/32581>.
- 176 Weisleder A, Mazzuchelli DSR, Lopez AS, *et al*. Reading Aloud and Child Development: A Cluster-Randomized Trial in Brazil. *Pediatrics* 2018; **141**. DOI:10.1542/peds.2017-0723.
- 177 Coelho Luzia Flavia, Barbosa Deise Lima Fernandes, Rizzutti Sueli, Bueno Orlando Francisco Amodeo, Miranda Monica Carolina. Group cognitive behavioral therapy for children and adolescents with ADHD. *Psicologia: Reflexão e Crítica* 2017; **30**.
- 178 Deakin Elisabeth Kuhn, Nunes Maria Lucia Tiellet. Effectiveness of child psychoanalytic psychotherapy in a clinical outpatient setting. *Journal of Child Psychotherapy* 2009; **35**: 290-301.
- 179 Hoffmann Elis Viviane, Duarte Cristiane S, Matsuzaka Camila T, *et al*. The positive impact of an intervention for maternal depression on child emotional and behavioral symptoms in a low-resource setting. *Brazilian Journal of Psychiatry* 2022; **44**: 590-601.
- 180 Pavoski Giulia Tatiana Tkaczyk, Toni Caroline Guisantes de Salvo, Batista Ana Priscila, Ignachewski Cynthia Lais. Prevenção universal e promoção de saúde em grupo de crianças a partir do Método Friends. [Universal prevention and promotion of health in a children's group from the Friends Method.]. *PSICO* 2018; **49**: 148-58.
- 181 Rafihi-Ferreira RE, Pires MLN, Silveiras EF de M. Behavioral intervention for sleep problems in childhood: a Brazilian randomized controlled trial. *Psicologia: Reflexão e Crítica* 2019; **32**.
- 182 Rocha Marina M, Costa Noel J, Silveiras Edwiges F. M. Changes in parents' and self-reports of behavioral problems in Brazilian adolescents after behavioral treatment with urine alarm for nocturnal enuresis. *Int Braz J Urol* 2008; **34**: 749-57.
- 183 Sá CA, Martins de Souza SA, Villela MCBVA, *et al*. Psychological Intervention with Parents Improves Treatment Results and Reduces Punishment in Children with Enuresis: A Randomized Clinical Trial. *J Urol* 2021; **205**: 570-6.
- 184 Lampert TL, Polanczyk G, Tramontina S, Mardini V, Rohde LA. Diagnostic performance of the

- CBCL-Attention Problem Scale as a screening measure in a sample of Brazilian children with ADHD. *J Atten Disord* 2004; **8**: 63-71.
- 185 Bitencourt Frizzo G, riGon Pedrini J, Silva de Souza D, Ruschel Bandeira D, Callegaro Borsa J. Reliability of child behavior checklist and teacher's report form in a sample of brazilian children. *Universitas Psychologica* 2015; **14**: 149-56.
- 186 Siqueira ARC, Silva MMM, Paula ET de, Araújo, Marcos Vinícius de, Teixeira, Maria Cristina TV, Carreiro LRR. Efeitos de intervenção comportamental em contexto escolar sobre desatenção e hiperatividade. *Psicologia: Teoria e Prática* 2019; **21**: 85-101.
- 187 Pires T, Rocha M, Assis S, Nobre F. Structural validation of the 'Teacher's report form' attention problems scale in a Brazilian sample. *Measurement Instruments for the Social Sciences* 2021; **3**: 5.
- 188 Azevêdo PVB e. Prevalência do Transtorno de Déficit de Atenção e Hiperatividade (TDAH) em uma População de Crianças e Adolescentes Índias da Etnia Karajá. 2009. <http://repositorio.bc.ufg.br/tede/handle/tde/1711>.
- 189 Avanci Joviana, Assis Simone, Oliveira Raquel, Pires Thiago. Childhood depression. Exploring the association between family violence and other psychosocial factors in low-income Brazilian schoolchildren. *Child Adolesc Psychiatry Ment Health* 2012; **6**. DOI:10.1186/1753-2000-6-26.
- 190 Martins Sílvia, Tramontina Silzá, Polanczyk Guilherme, Eizirik Mariana, Swanson James M, Rohde Luis A. Weekend Holidays During Methylphenidate Use in ADHD Children: A Randomized Clinical Trial. *J Child Adolesc Psychopharmacol* 2004; **14**: 195-205.
- 191 Soares Lorryne Stephane, Costa Danielle de Souza, Malloy-Diniz Leandro Fernandes, Romano-Silva Marco Aurélio, de Paula Jonas Jardim, de Miranda Débora Marques. Investigation on the attention deficit hyperactivity disorder effect on infatuation and impulsivity in adolescents. *Front Behav Neurosci* 2019; **13**. DOI:10.3389/fnbeh.2019.00137.
- 192 Tafla TL, Pires RAD, da Rocha MM, *et al*. Psychometric properties of the brief problem monitor-parent form in community and clinical samples of Brazilian children. *J Psychopathol Behav Assess* 2024; published online June 3. DOI:10.1007/s10862-024-10141-4.
- 193 Brasil HHA, Bordin IA. Convergent validity of K-SADS-PL by comparison with CBCL in a Portuguese speaking outpatient population. *BMC Psychiatry* 2010; **10**: 1-11.
- 194 Roessner Veit, Becker Andreas, Rothenberger Aribert, Rohde Luis Augusto, Banaschewski Tobias. A cross-cultural comparison between samples of Brazilian and German children with ADHD/HD using the Child Behavior Checklist. *Eur Arch Psychiatry Clin Neurosci* 2007; **257**: 352-9.
- 195 Avanci J, Assis S, Oliveira R, Pires T. [When living with violence brings a child close to depressive behavior]. *Cien Saude Colet* 2009; **14**: 383-94.
- 196 Rocha M M, Rescorla L A, Emerich D R, *et al*. Behavioural/emotional problems in Brazilian children: Findings from parents' reports on the Child Behavior Checklist. *Epidemiol Psychiatr Sci* 2013; **22**: 329-38.
- 197 Amorim R de M. Child Behavior Checklist for Ages 6-18 (CBCL/6-18) : estudo exploratório de suas evidências de validade e precisão em uma amostra brasileira. 2020. <http://ri.ufmt.br/handle/1/2958>.
- 198 de Oliveira Irismar Reis, Matos-Ragazzo Ana Cristina, Zhang Yuning, *et al*. Disentangling the

- mental health impact of childhood abuse and neglect: A replication and extension study in a Brazilian sample of high-risk youth. *Child Abuse Negl* 2018; **80**: 312-23.
- 199 da Matta Reinalda Melo, Ramos Denise Gimenez. The effectiveness of Sandplay Therapy in children who are victims of maltreatment with internalizing and externalizing behavior problems. *Estudos de Psicologia* 2021; **38**.
- 200 da Rocha Marina, Ollendick Thomas, Alckmin-Carvalho Felipe, Campos Livia, Asbahr Fernando, El Rafihi-Ferreira Renatha. Fears in preschoolers: translation, reliability, and validity of the Fear Survey Schedule for Infant-Preschoolers (FSSIP) - Brazilian version. *Trends in Psychiatry and Psychotherapy* 2022; **44**. DOI:10.47626/2237-6089-2020-0170.
- 201 Bara TS, Farias AC, Felden EP, Cordeiro ML. Receiver operating characteristic curve analysis of the Child Behavior Checklist and Teacher's Report Form for assessing autism spectrum disorder in preschool-aged children. *Neuropsychiatr Dis Treat* 2018; **14**: 95-102.
- 202 Baraldi G da S, Rojahn J, Seabra AG, Carreiro LRR, Teixeira MCTV. Translation, adaptation, and preliminary validation of the Brazilian version of the Behavior Problems Inventory (BPI-01). *Trends in Psychiatry and Psychotherapy* 2013; **35**: 198-211.
- 203 Fontana Fabio Eduardo, da Silva Michael Pereira, Mazzardo Oldemar, *et al*. Cross-cultural adaptation and psychometric assessment of the Revised Child Anxiety and Depression Scale in Brazilian youth. *Journal of Asia Pacific Counseling* 2019; **9**: 1-16.
- 204 Isolan LR. Ansiedade na infância e adolescência e bullying escolar em uma amostra comunitária de crianças e adolescentes. 2012. <http://hdl.handle.net/10183/56663>.
- 205 DeSousa Diogo Araújo, Salum Giovanni Abrahão, Isolan Luciano Rassier, Manfro Gisele Gus. Sensitivity and specificity of the Screen for Child Anxiety Related Emotional Disorders (SCARED): A community-based study. *Child Psychiatry Hum Dev* 2013; **44**: 391-9.
- 206 DeSousa DA, Zibetti MR, Trentini CM, Koller SH, Manfro GG, Salum GA. Screen for child anxiety related emotional disorders: are subscale scores reliable? A bifactor model analysis. *J Anxiety Disord* 2014; **28**: 966-70.
- 207 Isolan Luciano, Salum Giovanni Abrahão, Osowski Andrea Tochetto, Amaro Estácio, Manfro Gisele Gus. Psychometric properties of the Screen for Child Anxiety Related Emotional Disorders (SCARED) in Brazilian children and adolescents. *J Anxiety Disord* 2011; **25**: 741-8.
- 208 Isolan Luciano, Pheula Gabriel, Salum Jr, *et al*. An open-label trial of escitalopram in children and adolescents with social anxiety disorder. *J Child Adolesc Psychopharmacol* 2007; **17**: 751-9.
- 209 de Souza CLSG, Pires PP, Couto ISL, de Vasconcelos NSSM, Menezes IG, de Oliveira IR. Development and psychometric properties of the Cognitive Distortions Questionnaire for Adolescents (CD-Quest-T). *TRENDS IN PSYCHIATRY AND PSYCHOTHERAPY* 2023; **45**. DOI:10.47626/2237-6089-2021-0214.
- 210 da Silva Júnior Estácio Amaro, de Brito Gomes Camila Albuquerque. Psychiatric comorbidities among adolescents with and without anxiety disorders: A community study. *J Bras Psiquiatr* 2015; **64**: 181-6.
- 211 Rosa M, Metcalf E, Rocha TB-M, Kieling C. Translation and cross-cultural adaptation into Brazilian

- Portuguese of the Mood and Feelings Questionnaire (MFQ)-Long Version. *Trends in psychiatry and psychotherapy* 2018; **40**: 72-8.
- 212 Sucupira Eduardo, Sabino Neto, Miguel, *et al.* Short Mood and Feelings Questionnaire for screening children and adolescents for plastic surgery: cross-cultural validation study. *Sao Paulo Med J* 2017; **135**: 518-28.
- 213 Manfro Pedro H, Pereira Rivka B, Rosa Martha, *et al.* Adolescent depression beyond dsm definition: A network analysis. *Eur Child Adolesc Psychiatry* 2021; : No Pagination Specified - No Pagination Specified.
- 214 Silva Elisabete Pereira, Emond Alan, Ludermir Ana Bernarda. Depression in childhood: The role of children's exposure to intimate partner violence and maternal mental disorders. *Child Abuse Negl* 2021; **122**. DOI:10.1016/j.chiabu.2021.105305.
- 215 Barron Ian, Freitas Fernando, Bosch Christina Anderson. Pilot randomized control trial: Efficacy of a group-based psychosocial program for youth with PTSD in the Brazilian Favelas. *J Child Adolesc Trauma* 2021; **14**: 335-45.
- 216 Klatchoian Denise A, Len Claudio A, Terreri Maria Teresa R. A, *et al.* Qualidade de vida de crianças e adolescentes de São Paulo: confiabilidade e validade da versão brasileira do questionário genérico Pediatric Quality of Life Inventory™ versão 4.0. *J Pediatr* 2008; **84**: 308-15.
- 217 Poeta LS, Duarte Mde F, Giuliano Ide C, Mota J. Interdisciplinary intervention in obese children and impact on health and quality of life. *J Pediatr* 2013; **89**: 499-504.
- 218 Scarpelli AC, Paiva SM, Pordeus IA, Ramos-Jorge ML, Varni JW, Allison PJ. Measurement properties of the Brazilian version of the Pediatric Quality of Life Inventory (PedsQL) cancer module scale. *Health Qual Life Outcomes* 2008; **6**: 7.
- 219 Simões Caroline Ferraz, Junior Nelson Nardo, Locatelli João Carlos, *et al.* A structural equation modeling associating obesity and body dissatisfaction with health-related biopsychosocial parameters in adolescents. *Current Psychology: A Journal for Diverse Perspectives on Diverse Psychological Issues* 2021; : No Pagination Specified - No Pagination Specified.
- 220 de Medeiros Pâmella, Cardoso Fernando Luiz, da Silva Walan Robert, Zequinão Marcela Almeida, Tamplain Priscila. Externalizing problems mediate the relationship between motor proficiency and internalizing problems in children: An extension of the Environmental Stress Hypothesis. *Hum Mov Sci* 2022; **81**. DOI:10.1016/j.humov.2021.102916.
- 221 Carlone Baldino Garcia N, Lopes WA, Locateli JC, *et al.* Multidisciplinary obesity treatment program improved health-related quality of life and positively correlated with anthropometric and body composition but not with cardiorespiratory fitness parameters in adolescents. *Qual Life Res* 2019; **28**: 1803-12.
- 222 Gonçalves Câmara, Sheila, Bedin Tomasi, Lívia Maria. Bienestar, salud e imagen corporal de adolescentes brasileiros: La importancia de los contextos familiares, de amistad y escolar. [Well-being, health and body image of Brazilian adolescents: The importance of family contexts, friendship and school.]. *Universitas Psychologica* 2015; **14**: 1399-410.
- 223 Schütz Fabiane Friedrich, Bedin Lívia Maria, Sarriera Jorge Castellá. Subjective well-being of Brazilian children from different family settings. *Appl Res Qual Life* 2019; **14**: 737-50.

- 224 Strelhow MRW, Sarriera JC, Casas F. Evaluation of Well-Being in Adolescence: Proposal of an Integrative Model with Hedonic and Eudemonic Aspects. *Child Indic Res* 2020; **13**: 1439-52.
- 225 Bedin LM, Sarriera JC. Dyadic Analysis of Parent-Children Subjective Well-Being. *Child Indic Res* 2014; **7**: 613-31.
- 226 Lemes Daniela Carolina Molina, Câmara Sheila Gonçalves, Alves Gehysa Guimarães, Aerts Denise. Satisfação com a imagem corporal e bem-estar subjetivo entre adolescentes escolares do ensino fundamental da rede pública estadual de Canoas/RS, Brasil. *Cien Saude Colet* 2018; **23**: 4289-98.
- 227 Câmara SG, Carlotto MS, Cabello R, Fernández-Berrocal P. Adaptation and validity of the Trait Meta-Mood scale for Brazilian adolescents. *Front Psychol* 2023; **14**: 1058426.
- 228 Schutz FF, Sarriera JC, Bedin LM. Subjective Well-being of Brazilian Children Over Time: Comparing Children's Worlds 1(st) and 3(rd) Wave of 10 and 12-year-olds Samples. *Child Indic Res* 2022; **15**: 433-46.
- 229 Dini G, Quaresma M, Ferreira L. Adaptação cultural e validação da versão brasileira da escala de auto-estima de Rosenberg. *Rev Bras Cir* 2001; **19**: 41-52.
- 230 Fortes Lde S, Filgueiras JF, Oliveira Fda C, Almeida SS, Ferreira ME. Etiological model of disordered eating behaviors in Brazilian adolescent girls. *Cad Saude Publica* 2016; **32**: e000024115.
- 231 Bueno GN. DEPENDÊNCIA DE INTERNET, ANSIEDADE, DEPRESSÃO E USO DE SUBSTÂNCIAS PSICOATIVAS NA ADOLESCÊNCIA TARDIA. 2020.
- 232 Amaral ACS. Imagem corporal de adolescentes: descrição e intervenção preventiva em âmbito escolar. 2015. <https://repositorio.ufjf.br/jspui/handle/ufjf/1544>.
- 233 Bandeira Marina, Rocha Sandra Silva, de Souza Thiago Magalhães Pereira, Del Prette Zilda Aparecida Pereira, Del Prette Almir. Comportamentos problemáticos em estudantes do ensino fundamental: Características da ocorrência e relação com habilidades sociais e dificuldades de aprendizagem. [Behavior problems in elementary school children and their relation to social skills and academic performance.]. *Estudos de Psicologia* 2006; **11**: 199-208.
- 234 Nunes Daiane, Faro André. The role of self-efficacy, self-esteem and self-concept in depression in adolescents. *Ciencias* 2021; **15**: 1-13.
- 235 Borsa Juliane Callegaro, Rodrigues Andrea Jannotti Nogueira, Bienemann Bheatrix, Damásio Bruno Figueiredo. Escala de Positividade: Evidências iniciais de validade para adolescentes Brasileiros. [Positivity Scale: Initial validity evidence for Brazilian adolescents.]. *Avaliação Psicológica* 2017; **16**: 301-9.
- 236 Fidelix Yara, Lofrano-Prado Mara C, Fortes Leonardo S, *et al.* Aerobic training performed at ventilatory threshold improves psychological outcomes in adolescents with obesity. *J Phys Act Health* 2019; **16**: 851-6.
- 237 Sbicigo JB, Dell'Aglio DD. Family Environment and Psychological Adaptation in Adolescents. *PSICOLOGIA-REFLEXAO E CRITICA* 2012; **25**: 615-22.
- 238 Smith HG, Garbett KM, Matheson EL, *et al.* The Body Esteem Scale for Adults and Adolescents: Translation, adaptation and psychometric validation among Brazilian adolescents. *Body Image* 2022; **42**: 213-21.

- 239 Matheson EL, Smith HG, Amaral ACS, *et al.* Using chatbot technology to improve Brazilian adolescents' body image and mental health at scale: Randomized controlled trial. *JMIR MHealth UHealth* 2023; **11**: e39934.
- 240 Gios Thaisa Silva, Owens Judith, Mecca Tatiana Pontrelli, *et al.* Translation and adaptation into Brazilian Portuguese and investigation of the psychometric properties of the Children's Sleep Habits Questionnaire (CSHQ-BR). *Sleep Med* 2022; **100**: 550-7.
- 241 Gios Thaísa, Mecca Tatiana P, Akemi Juliana, Kataoka Lucas E, Lowenthal Rosane. Hábitos de Sono e Relação com Indicadores de Saúde Mental na Infância. [Sleep habits and relationship with mental health indicators in childhood.]. *Psicologia: Teoria e Prática* 2022; **24**: 1-22.
- 242 Gios Thaisa Silva, Mecca Tatiana Pontrelli, Kataoka Lucas Eiji, Rezende Thais Cristina Barroso, Lowenthal Rosane. Sleep problems before and during the covid-19 pandemic in children with autism spectrum disorder, down syndrome, and typical development. *J Autism Dev Disord* 2022; : No Pagination Specified - No Pagination Specified.
- 243 Guedes DZ, Primi R, Kopelman BI. BINS validation - Bayley neurodevelopmental screener in Brazilian preterm children under risk conditions. *Infant Behav Dev* 2011; **34**: 126-35.
- 244 Del Prette A, Del Prette ZAP. Habilidades sociais e dificuldades de aprendizagem: Teoria e pesquisa sob um enfoque multimodal. In: Del Prette A, Del Prette ZAP, eds. Habilidades sociais, desenvolvimento e aprendizagem: questões conceituais, avaliação e intervenção. Campinas, Brazil: Alínea, 2003: 167-206.
- 245 Bandeira Marina, Del Prette Zilda Aparecida Pereira, Del Prette Almir, Magalhães Thiago. Validação das escalas de habilidades sociais, comportamentos problemáticos e competência acadêmica (SSRS-BR) para o ensino fundamental. [Validating scales of social skills, behavior problems and academic competence (SSRS-BR) for elementary school.]. *Psicologia: Teoria e Pesquisa* 2009; **25**: 271-82.
- 246 Freitas LC. Habilidades sociais de crianças com diferentes necessidades educacionais especiais: comparações múltiplas. 2011. <https://repositorio.ufscar.br/handle/ufscar/2883>.
- 247 Pereira Camila de Souza, Cia Fabiana, Barham Elizabeth Joan. Autoconceito, habilidades sociais, problemas de comportamento e desempenho acadêmico na puberdade: inter-relações e diferenças entre sexos<sup>^</sup>ipt. *Interação psicol* 2008; **12**: 203-13.
- 248 Cassoni Cynthia, Marturano Edna Maria, Coimbra Susana, Fontaine Anne Marie. A validation study of the Multidimensional Life Satisfaction Scale for Children. *Psicologia: Reflexão e Crítica* 2017; **30**. DOI:10.1186/s41155-017-0068-6.
- 249 Cassoni C, Correia-Zanini MRG, Marturano EM, Fontaine AM. Adaptive tasks: school transition from the 5th to 6th grade of elementary education. *Psico-USF* 2020; **25**: 481-92.
- 250 Freitas LC, Del Prette ZAP. Validade de critério do sistema de avaliação de habilidades sociais (SSRS-BR). *Psicol Reflex Crit* 2010; **23**: 430-9.
- 251 Leme VBR, Marturano EM. Preditores de comportamentos e competência acadêmica de crianças de famílias nucleares, monoparentais e recasadas. *Psicologia* 2014; **27**: 153-62.
- 252 Dias Natália Martins, Seabra Alessandra Gotuzo. The promotion of Executive Functioning in a



- Brazilian public school: A pilot study. *Span J Psychol* 2015; **18**.
- 253 Almeida Mireille C, Valente Juliana Y, Sanchez Zila M. Predicting latent classes of drug-related problems among adolescents: secondary analysis of a cluster randomized controlled trial. *Brazilian Journal of Psychiatry* 2021; **43**: 393-401.
- 254 Valente Juliana Y, Cogo-Moreira Hugo, Sanchez Zila M. Evaluating the effects of parenting styles dimensions on adolescent drug use: Secondary analysis of #Tamojuntó randomized controlled trial. *Eur Child Adolesc Psychiatry* 2020; **29**: 979-87.
- 255 Valente Juliana Y, Cogo-Moreira Hugo, Sanchez Zila M. Decision-making skills as a mediator of the #Tamojuntó school-based prevention program: Indirect effects for drug use and school violence of a cluster-randomized trial. *Drug Alcohol Depend* 2020; **206**. DOI:10.1016/j.drugalcdep.2019.107718.
- 256 Conegundes Lara, Valente Juliana Y, Cogo-Moreira Hugo, Martins Camila Bertini, Andreoni Solange, Sanchez Zila M. Transition from nonuse to use of alcohol or binge drinking among adolescents: Secondary analysis of a randomized controlled trial. *Addict Behav* 2020; **102**. DOI:10.1016/j.addbeh.2019.106159.
- 257 Cogo-Moreira H, Gusmões JD, Valente JY, Eid M, Sanchez ZM. Does #Tamojuntó alter the dynamic between drug use and school violence among youth? Secondary analysis from a large cluster-randomized trial. *Eur Child Adolesc Psychiatry* 2023; **32**: 293-302.
- 258 Sanchez ZM, Valente JY, Sanudo A, *et al*. The #Tamojuntó Drug Prevention Program in Brazilian Schools: a Randomized Controlled Trial. *Prev Sci* 2017; **18**: 772-82.
- 259 Almeida Mireille Coêlho, Cogo-Moreira Hugo, Galvão Patrícia Paiva de O, Mari Jair J, Sanchez Zila M. Can psychopathology predict adolescent drug use or moderate the effect of a school-based drug use prevention program? *Int J Ment Health Addict* 2023; : No Pagination Specified - No Pagination Specified.
- 260 Garcia-Cerde R, Valente JY, Sanchez ZM. Changes in alcohol beliefs mediate the effects of a school-based prevention program on alcohol use among Brazilian adolescents. *Addict Behav* 2023; **137**: 107522.
- 261 Sanchez Zila M, Valente Juliana Y, Gusmões Julia D. P, *et al*. Effectiveness of a school-based substance use prevention program taught by police officers in Brazil: Two cluster randomized controlled trials of the PROERD. *International Journal of Drug Policy* 2021; **98**: 1-10.
- 262 Valente Juliana Y, Cogo-Moreira Hugo, Sanchez Zila M. Applying a pattern-centered approach to assess the effect of a school-based drug use prevention program in Brazil: A cluster randomized controlled trial. *J Prev Interv Community* 2022; : No Pagination Specified - No Pagination Specified.
- 263 Valente Juliana Y, Sanchez Zila M. Mediating factors of a Brazilian school-based drug prevention program. *Int J Ment Health Addict* 2022; : No Pagination Specified - No Pagination Specified.
- 264 do Nascimento MO, De Micheli D. Evaluation of different school-based preventive interventions for reducing the use of psychotropic substances among students: a randomized study. *Cien Saude Colet* 2015; **20**: 2499-510.
- 265 Sanchez ZM, Valente JY, Gubert FA, *et al*. Short-term effects of the strengthening families Program

- (SFP 10-14) in Brazil: a cluster randomized controlled trial. *Child Adolesc Psychiatry Ment Health* 2024; **18**: 64.
- 266 Kumpfer KL, Magalhães C. Strengthening Families Program: An Evidence-Based Family Intervention for Parents of High-Risk Children and Adolescents. *J Child Adolesc Subst Abuse* 2018; **27**: 174-9.
- 267 Murta SG, de Almeida Nobre-Sandoval L, de Souza Pedralho M, *et al.* Needs assessment for cultural adaptation of Strengthening Families Program (SFP 10-14-UK) in Brazil. *Psicol Reflex Crit* 2018; **31**: 25.
- 268 McBride N, Farrington F, Midford R, Meuleners L, Phillips M. Harm minimization in school drug education: final results of the School Health and Alcohol Harm Reduction Project (SHAHRP). *Addiction* 2004; **99**: 278-91.
- 269 Santos IS, Munhoz TN, Barcelos RS, *et al.* Evaluation of the Happy Child Program: a randomized study in 30 Brazilian municipalities. *Cien Saude Colet* 2022; **27**: 4341-63.
- 270 Santos IS, Del-Ponte B, Tovo-Rodrigues L, *et al.* Effect of Parental Counseling on Infants' Healthy Sleep Habits in Brazil: A Randomized Clinical Trial. *JAMA Netw Open* 2019; **2**: e1918062.
- 271 Hallal PC, Bertoldi AD, Domingues MR, *et al.* Cohort Profile: The 2015 Pelotas (Brazil) Birth Cohort Study. *Int J Epidemiol* 2018; **47**: 1048-1048h.
- 272 World Health Organization. Department of Child and Adolescent Health and Development. Handbook IMCI: Integrated Management of Childhood Illness. World Health Organization, 2005.
- 273 Fernandes VR, Scipião Ribeiro ML, Araújo NB, *et al.* Effects of Capoeira on children's executive functions: A randomized controlled trial. *Ment Health Phys Act* 2022; **22**: 100451.
- 274 Martins RC, Machado AKF, Shenderovich Y, *et al.* Parental attendance in two early-childhood training programmes to improve nurturing care: A randomized controlled trial. *Child Youth Serv Rev* 2020; **118**: 105418.
- 275 Silva J. Parents Raising Safe Kids: ACT 8-week program for parents. *Washington, DC: American Psychological Association* 2007.
- 276 Altafim ERP, Linhares MBM. Preventive intervention for strengthening effective parenting practices: A randomized controlled trial. *J Appl Dev Psychol* 2019; **62**: 160-72.
- 277 Altafim ERP, McCoy DC, Linhares MBM. Unpacking the impacts of a universal parenting program on child behavior. *Child Dev* 2021; **92**: 626-37.
- 278 Caetano SC, Mariano M, da Silva AR, *et al.* Effectiveness of the Elos 2.0 Program, a Classroom Good Behavior Game Version in Brazil. *Int J Ment Health Addict* 2024; published online Feb 20. DOI:10.1007/s11469-024-01256-6.
- 279 Smith S, Barajas K, Ellis B, Moore C, McCauley S, Reichow B. A Meta-Analytic Review of Randomized Controlled Trials of the Good Behavior Game. *Behav Modif* 2021; **45**: 641-66.
- 280 Lorenzo G, Aveiro AG, Vieira AG, *et al.* Do good behavior game ao programa elos: a adaptação transcultural de um programa de prevenção infantil. *Prevenção ao uso de drogas no Brasil: implantação e avaliação de programas no Brasil Brasília: Ministério da Saúde* 2018; : 282.

- 281 da Silva Bandeira Aleksandra, Beets Michael W, da Silveira Pablo Magno, *et al.* Efforts on changing lifestyle behaviors may not be enough to improve health-related quality of life among adolescents: A cluster-randomized controlled trial. *Front Psychol* 2021; **12**. DOI:10.3389/fpsyg.2021.614628.
- 282 Lima RA, de Barros MVG, Bezerra J, *et al.* Universal school-based intervention targeting depressive symptoms in adolescents: A cluster randomized trial. *Scand J Med Sci Sports* 2022; **32**: 622-31.
- 283 Barbosa Filho VC, Bandeira A da S, Minatto G, *et al.* Effect of a Multicomponent Intervention on Lifestyle Factors among Brazilian Adolescents from Low Human Development Index Areas: A Cluster-Randomized Controlled Trial. *Int J Environ Res Public Health* 2019; **16**. DOI:10.3390/ijerph16020267.
- 284 Leme ACB, Philippi ST, Thompson D, Nicklas T, Baranowski T. 'Healthy Habits, Healthy Girls—Brazil': an obesity prevention program with added focus on eating disorders. *Eating and Weight Disorders - Studies on Anorexia, Bulimia and Obesity* 2019; **24**: 107-19.
- 285 Lubans DR, Morgan PJ, Okely AD, *et al.* Preventing Obesity Among Adolescent Girls: One-Year Outcomes of the Nutrition and Enjoyable Activity for Teen Girls (NEAT Girls) Cluster Randomized Controlled Trial. *Arch Pediatr Adolesc Med* 2012; **166**: 821-7.
- 286 Amaral ACS, Stice E, Ferreira MEC. A controlled trial of a dissonance-based eating disorders prevention program with Brazilian girls. *Psicol Reflex Crit* 2019; **32**: 13.
- 287 Stice E, Rohde P, Shaw H, Gau J. An effectiveness trial of a selected dissonance-based eating disorder prevention program for female high school students: Long-term effects. *J Consult Clin Psychol* 2011; **79**: 500-8.
- 288 Gonçalves LL, Voos MC, de Almeida MHM, Caromano FA. Massage and storytelling reduce aggression and improve academic performance in children attending elementary school. *Occup Ther Int* 2017; **2017**: 5087145.
- 289 Toscano CVA, Ferreira JP, Quinaud RT, Silva KMN, Carvalho HM, Gaspar JM. Exercise improves the social and behavioral skills of children and adolescent with autism spectrum disorders. *Front Psychiatry* 2022; **13**: 1027799.
- 290 Sugaya LS, Salum GA, de Sousa Gurgel W, *et al.* Efficacy and safety of methylphenidate and behavioural parent training for children aged 3-5 years with attention-deficit hyperactivity disorder: a randomised, double-blind, placebo-controlled, and sham behavioural parent training-controlled trial. *Lancet Child Adolesc Health* 2022; **6**: 845-56.
- 291 de Moraes ÍAP, Monteiro CB de M, Silva TD da, *et al.* Motor learning and transfer between real and virtual environments in young people with autism spectrum disorder: A prospective randomized cross over controlled trial. *Autism Res* 2020; **13**: 307-19.
- 292 Xavier A, Otero P, Blanco V, Vázquez FL. Efficacy of a problem-solving intervention for the indicated prevention of suicidal risk in young Brazilians: Randomized controlled trial. *Suicide Life Threat Behav* 2019; **49**: 1746-61.
- 293 Vázquez FL, Otero P, Blanco V, Torres ÁJ. Terapia de solución de problemas para la depresión: una breve guía de práctica en grupo. Alianza Editorial, 2015.
- 294 Gouveia VV, Milfont TL, da Fonseca PN, Coelho JAP de M. Life satisfaction in Brazil: Testing the

- psychometric properties of the satisfaction with life scale (SWLS) in five Brazilian samples. *Soc Indic Res* 2009; **90**: 267-77.
- 295 Marteleto MRF, Pedromônico MRM. Validity of autism behavior checklist (ABC): preliminary study. *Brazilian Journal of Psychiatry* 2005; **27**: 295-301.
- 296 Grassi-Oliveira R, Cogo-Moreira H, Salum GA, *et al.* Childhood Trauma Questionnaire (CTQ) in Brazilian samples of different age groups: findings from confirmatory factor analysis. *PLoS One* 2014; **9**: e87118.
- 297 Gonçalves FG, Heldt E, Peixoto BN, Rodrigues GA, Filipetto M, Guimarães LSP. Construct validity and reliability of Olweus Bully/Victim Questionnaire - Brazilian version. *Psicologia* 2016; **29**. DOI:10.1186/s41155-016-0019-7.
- 298 Freitas Lucas Cordeiro, Del Prette Zilda Aparecida Pereira. Validade de construto do Sistema de Avaliação de Habilidades Sociais para crianças brasileiras com deficiência intelectual. [Construct validity of the Social Skills Rating System for Brazilian children with mental disabilities.]. *Revista Interamericana de Psicología* 2010; **44**: 312-20.
- 299 Castro CT, Teixeira CSS, Cairo SMC, Lima GP, Bezerra VM, Medeiros DS. Body image and associated factors among Quilombola and non-Quilombola adolescents in a semi-arid rural area in Bahia, Brazil. *Vulnerable Child Youth Stud* 2022; **17**: 82-96.

**Figure 1** - Flowchart describing the search and screening procedures

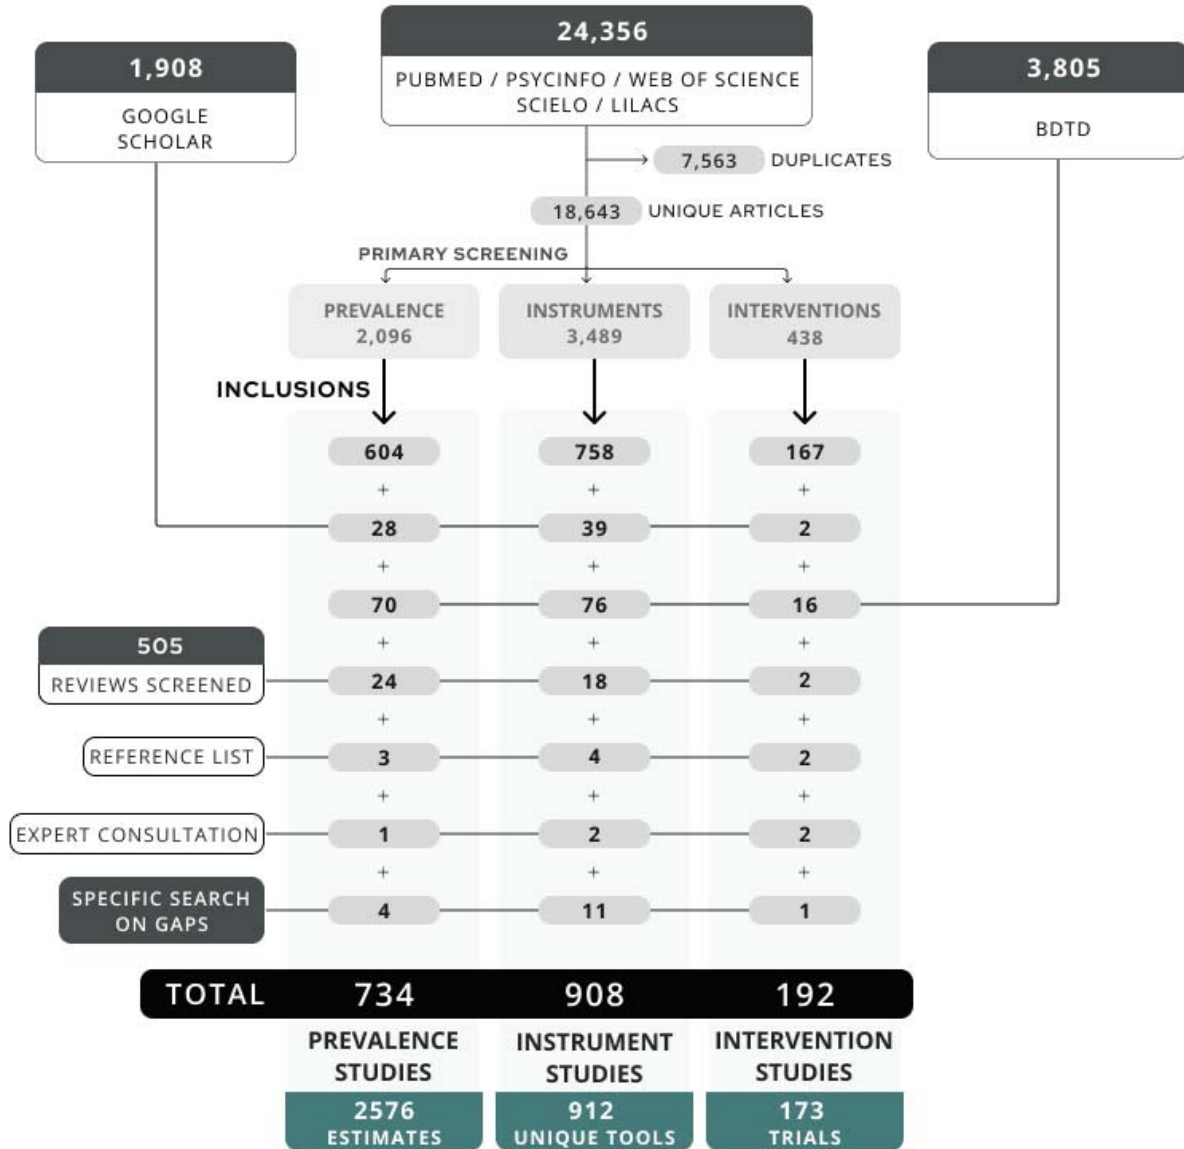

**Figure 2** - Time trend analysis and areas of concentration of scientific production on child and Brazil.

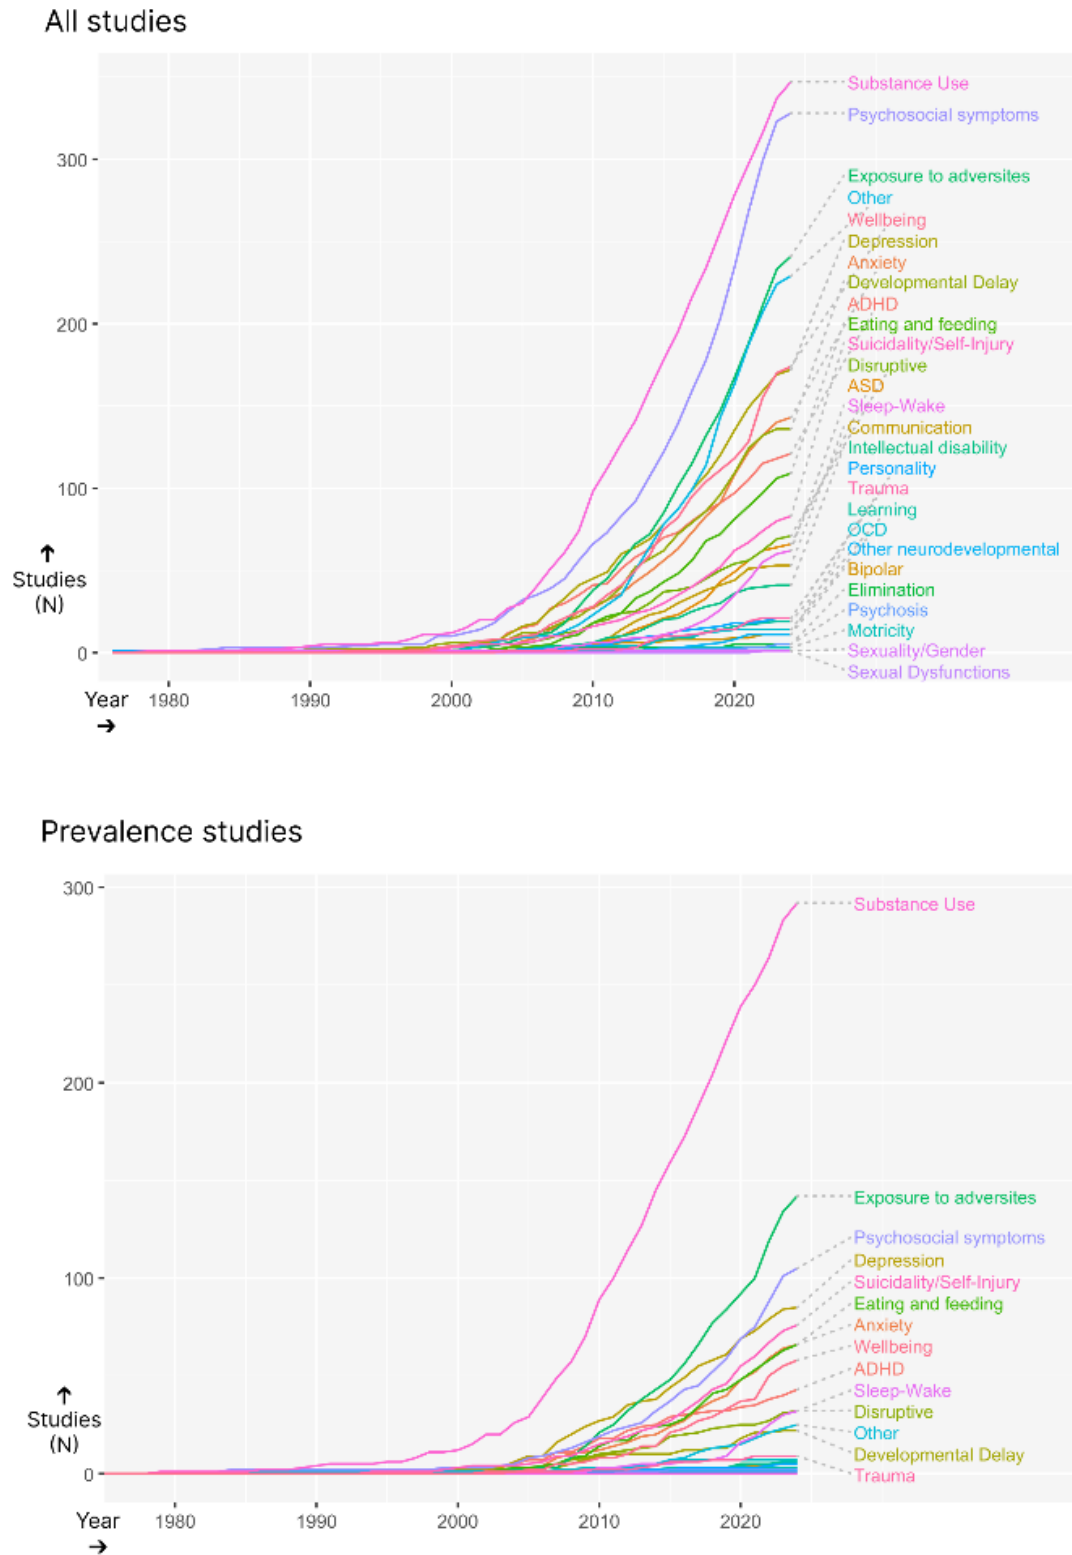

## Instrument Studies

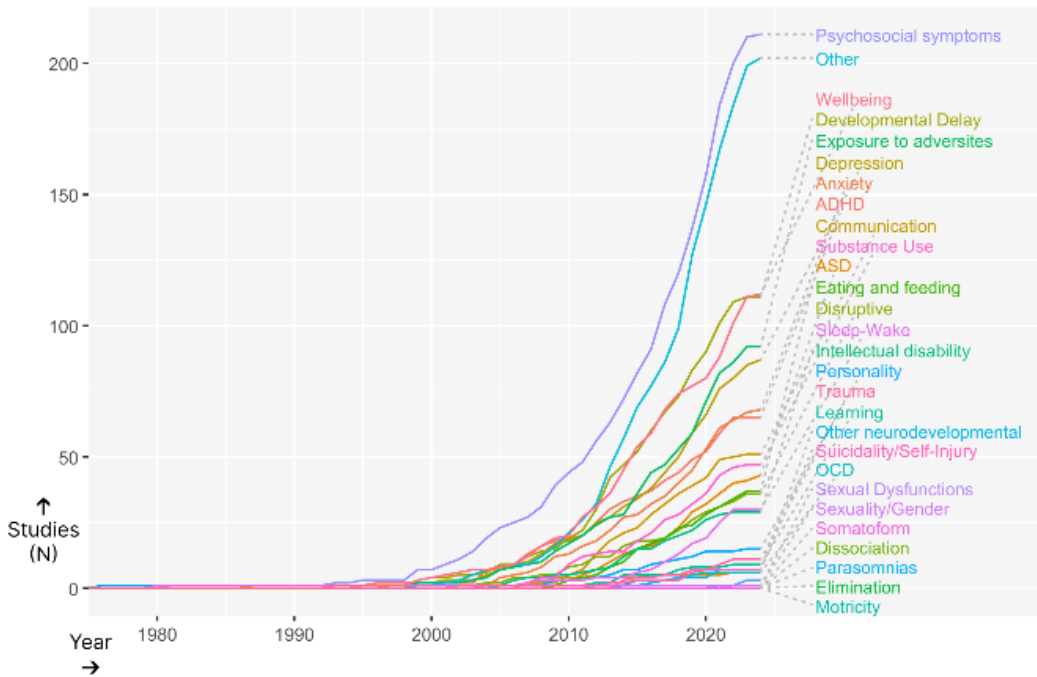

## Intervention Studies

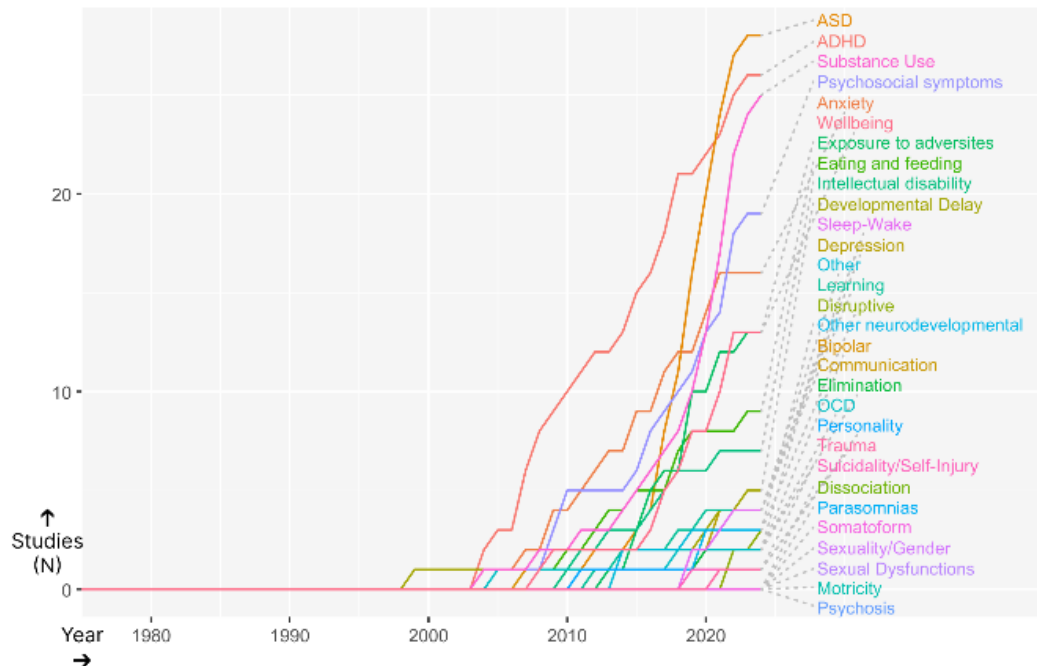

**Note:** A single study may be included in more than one area. For example, intervention studies could provide information on the responsiveness of an instrument, while prevalence studies might offer psychometric validation of an instrument. **Abbreviations:** attention deficit/hyperactivity disorders (ADHD), autism-spectrum disorders (ASD), obsessive-compulsive disorder (OCD).

**Figure 3 - Regional analysis of represented population and conditions according to the number of studies**

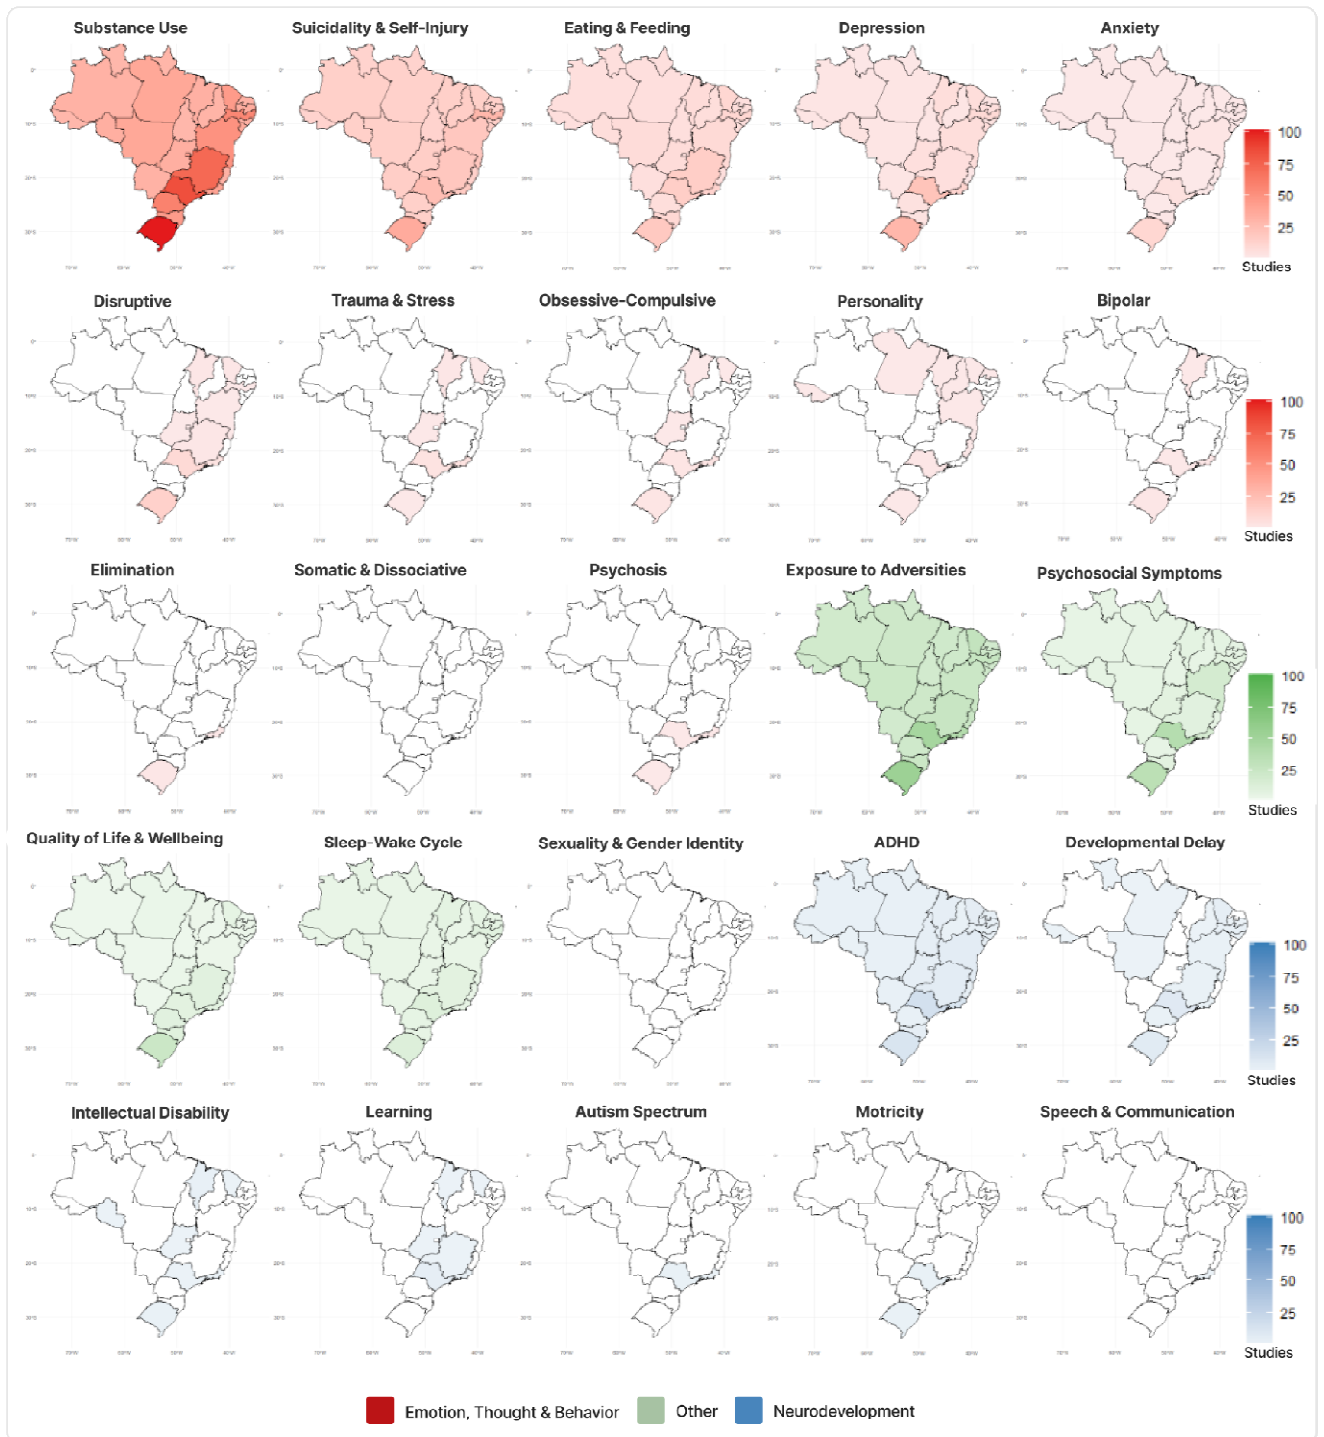

**Note:** A single study may be included in more than one condition and region. **Abbreviations:** attention deficit/hyperactivity disorders (ADHD).



**Table 1** - Best data on the prevalence of mental disorders: selection of ten studies (N ≥ 1,000, using structured clinical interview and diagnostic manual criteria)

| Study<br>(most recent first)        | Instrument / criteria | Description                                                | City (State) Region     | Year of collection | Sample size | Age groups<br>Girls percentage<br>Ethnicity                                             | Point prevalence<br>(highest to lowest)                                                                                             |                                                                                                                                     |
|-------------------------------------|-----------------------|------------------------------------------------------------|-------------------------|--------------------|-------------|-----------------------------------------------------------------------------------------|-------------------------------------------------------------------------------------------------------------------------------------|-------------------------------------------------------------------------------------------------------------------------------------|
| Bauer et al. (2022) <sup>77</sup>   | DAWBA DSM-V           | Follow-up of 1993 Pelotas birth cohort <sup>94</sup>       | Pelotas (RS) South      | 2010 and 2015      | 4229        | 6 and 11 years (two time-points)<br>48.1%<br><br>Black or mixed: 38.3%<br>White: 61.7%  | (At 6 years-old)<br>Any psychiatric disorder: 16.3%<br>Anxiety disorders: 8.9%<br>ADHD 2.6%<br>CD/ODD: 2.6%<br>Mood disorders: 1.3% | (At 11 years-old)<br>Any psychiatric disorder: 15.6%<br>Anxiety disorders: 4.3%<br>ADHD: 4%<br>CD/ODD: 3.6%<br>Mood disorders: 3.2% |
| Álvares et al. (2021) <sup>95</sup> | MINI DSM-IV           | Follow-up of 1997/1998 São Luís birth cohort <sup>96</sup> | São Luis (MA) Northeast | 2016               | 2486        | 18 - 19 years<br>52.4%                                                                  | PTSD: 2.5%                                                                                                                          |                                                                                                                                     |
| Anselmi et al. (2010) <sup>42</sup> | DAWBA DSM-IV          | Follow-up of 1993 Pelotas birth cohort <sup>94</sup>       | Pelotas (RS) South      | 2004 to 2006       | 4448        | 12 years<br>50.3%<br><br>Black or mixed: 28.5%<br>Asian or native: 4.7%<br>White: 66.8% | Any psychiatric disorder: 10.8%<br>ADHD: 4.1%<br>Anxiety disorder: 2.2%<br>CD: 2.2%                                                 | Major Depressive Disorder: 1.6%<br>Eating disorder: 0.1%<br>ODD: 2.1%                                                               |
| Simões et al. (2020) <sup>96</sup>  | MINI DSM-IV           | Follow-up of 1997/1998 São Luís birth cohort               | São Luis (MA) Northeast | 2016               | 2515        | 18 - 19 years<br>52.4%<br><br>Black: 16.9%<br>Mixed: 62.4%<br>White: 20.7%              | MDD: 11.8%<br>Bipolar disorder: 11.8%                                                                                               | GAD: 3.5%                                                                                                                           |

|                                                  |                  |                                                      |                                                                                                          |              |      |                                                           |                                                                                                                                                                                                       |                                                                                                                                                                                           |
|--------------------------------------------------|------------------|------------------------------------------------------|----------------------------------------------------------------------------------------------------------|--------------|------|-----------------------------------------------------------|-------------------------------------------------------------------------------------------------------------------------------------------------------------------------------------------------------|-------------------------------------------------------------------------------------------------------------------------------------------------------------------------------------------|
| Gallo et al. (2017) <sup>97</sup>                | MINI DSM-IV      | Follow-up of 1993 Pelotas birth cohort <sup>94</sup> | Pelotas (RS) South                                                                                       | 2011         | 3715 | 18 years<br>52.6%<br><br>Non-white: 23.2%<br>White: 76.8% | MDD: 6.8%                                                                                                                                                                                             |                                                                                                                                                                                           |
| Paula et al. (2015) <sup>78</sup>                | K-SADS-PL DSM-IV | Cross-sectional study                                | Caeté (RJ), Goianira (GO), Itaitinga (CE), Rio Preto da Eva (AM) Southeast, Center, Northeast, and North | 2010 to 2011 | 1676 | 6 - 16 years<br>51.4%                                     | Any psychiatric disorder: 13.1%<br>Any anxiety disorder: 7.2%<br>Any ADHD: 4.5%<br>Specific phobia: 3.8%<br>Any CD/ODD: 2.3%<br>Social phobia: 2.0%<br>ODD: 1.7%<br>Separation anxiety disorder: 1.3% | Agoraphobia: 0.7%<br>OCD: 0.6%<br>CD: 0.6%<br>Any depressive disorder: 0.5%<br>GAD: 0.4%<br>PTSD: 0.3%<br>MDD: 0.2%<br>Dysthymia: 0.1%                                                    |
| Vivian et al. (2014) <sup>98</sup>               | K-SADS-PL DSM-IV | Cross-sectional study                                | Porto Alegre (RS) South                                                                                  | 2009 to 2011 | 2323 | 14 - 17 years<br>46.8%                                    | OCD: 3.22%                                                                                                                                                                                            |                                                                                                                                                                                           |
| Salum et al. (2021) <sup>99</sup>                | K-SADS-PL DSM-IV | Cross-sectional study                                | Porto Alegre (RS) South                                                                                  | 2008 to 2009 | 2457 | 10 - 17 years                                             | Any anxiety disorder: 5.62%<br>GAD: 3.87%                                                                                                                                                             | Social Anxiety Disorder: 2.32%<br>Separation Anxiety Disorder: 2%                                                                                                                         |
| Fleitlich-Bilyk and Goodman (2004) <sup>79</sup> | DAWBA DSM-IV     | Cross-sectional study                                | Taubaté (SP) Southeast                                                                                   | 2000 to 2001 | 1251 | 7 - 14 years<br>47%                                       | Any psychiatric diagnosis: 12.7%<br>Any CD/ODD: 7.0%<br>Any anxiety disorder: 5.2%<br>ODD: 3.2%<br>CD: 2.2%<br>Anxiety NOS: 2.1%<br>ADHD: 1.8%                                                        | Disruptive disorder NOS: 1.5%<br>Separation anxiety disorder: 1.4%<br>Any depressive disorder: 1%<br>Specific phobia: 1.0%<br>Social phobia: 0.7%<br>PTSD: 0.1%<br>OCD: 0.1%<br>GAD: 0.4% |
| Salum et. al                                     | DAWBA DSM-IV     | Brazilian High Risk Cohort                           | Porto Alegre (RS) and São                                                                                | 2010 to 2011 | 958* | 6 - 14 years<br>45.2%                                     | Any disorder: 19.9%<br>Any OCD: 5.5%                                                                                                                                                                  | Bipolar: 0.3%<br>Any PDD/Autism: 0.3%                                                                                                                                                     |

|                      |  |                     |                                   |  |  |                                   |                                                                                                                                  |                                                                                                                                                      |
|----------------------|--|---------------------|-----------------------------------|--|--|-----------------------------------|----------------------------------------------------------------------------------------------------------------------------------|------------------------------------------------------------------------------------------------------------------------------------------------------|
| (2015) <sup>43</sup> |  | Study <sup>43</sup> | Paulo (SP)<br>South and Southeast |  |  | Non-white: 39.5%<br>White: 60.5%* | ADHD (combined): 2.9%<br>Panic disorder: 2.9%<br>Any CD/ODD: 2.1%<br>MDD: 1.8%<br>PTSD: 1.6%<br>GAD: 0.8%<br>Social phobia: 0.3% | Anxiety (others) :<br>0.2%<br>Agoraphobia: 0.2%<br>Eating Disorder: 0.1%<br>Tic Disorders: 3%<br>Separation Anxiety Disorder: 0.00%<br>Psychosis: 0% |
|----------------------|--|---------------------|-----------------------------------|--|--|-----------------------------------|----------------------------------------------------------------------------------------------------------------------------------|------------------------------------------------------------------------------------------------------------------------------------------------------|

**Notes:** the full dataset with 734 studies on 2576 prevalence estimates can be consulted in **Supplementary File 1**.

Cruzeiro et al. (2008)<sup>100</sup> was not included here because, in spite of employing DSM-IV criteria evaluated with a structured interview, it sets two positive answers as the cut-off point for conduct disorder diagnosis, instead of three as established in the manual. \*The Brazilian High Risk Cohort study is composed by 2,512 participants, but we only extracted data for the random, community-based sample (n=958), excluding the high-risk selected sample.

**Abbreviations:** **ADHD** (Attention Deficit Hyperactivity Disorder); **CD** (Conduct Disorder); **DAWBA** (Development and Well-Being Assessment); **DSM** (Diagnostic and Statistical Manual of Mental Disorders); **GAD** (Generalized Anxiety Disorder); **K-SADS-PL** (Schedule for Affective Disorders and Schizophrenia for School Aged Children: Present and Lifetime Version); **MDD** (Major Depressive Disorder); **MINI** (Mini International Neuropsychiatric Interview); **NOS** (Not Otherwise Specified); **OCD** (Obsessive-Compulsive Disorder); **ODD** (Oppositional Defiant Disorder); **PTSD** (Post-Traumatic Stress Disorder).

**Table 2** - Nationally-representative estimates of mental health-related constructs: selection of 37 studies (N ≥ 10,000, data collected since 2010, nationwide)

| Study ID | Datasources                                                                                                                                    | Funding | Years       | Sample description                                                                                                                           | Assessment                                                                           | Prevalence / Rate per 100,000 people (highest to lowest)                                                                                                                                                                                                                  |                                                                                                                                                                                                                          |
|----------|------------------------------------------------------------------------------------------------------------------------------------------------|---------|-------------|----------------------------------------------------------------------------------------------------------------------------------------------|--------------------------------------------------------------------------------------|---------------------------------------------------------------------------------------------------------------------------------------------------------------------------------------------------------------------------------------------------------------------------|--------------------------------------------------------------------------------------------------------------------------------------------------------------------------------------------------------------------------|
| 61.      | National Information System of Mortality (SIM)<br><br>The National Institute of Geography and Statistics (IBGE)                                | Public  | 2010 - 2020 | National system notifications<br>1 to 19 years-old                                                                                           | Death registers<br><br>National population census                                    | <b>Suicide mortality rates</b><br>☒ Indigenous population (10 - 14 years): <b>11</b><br>☒ 15 - 19 years: <b>4.3 to 5.3</b><br>☒ 10 - 19 years: <b>2.43 to 2.65</b><br>☒ 1 - 19 years: <b>1.67</b><br>☒ Under 15 years: <b>0.59 to 0.86</b><br>☒ 10 - 14 years: <b>0.6</b> | <b>Homicide-mortality rates</b><br>● 1 - 19 years: <b>10.87</b><br><br><b>Firearm-related death rates</b><br>● 1 - 19 years: <b>10.04</b><br><br><b>Motor vehicle accident death rates</b><br>● 1 - 19 years: <b>5.2</b> |
| 48.      | Notifiable Diseases Information System (Sinan)<br><br>The National Institute of Geography and Statistics (IBGE)                                | Public  | 2009 - 2021 | National system notifications<br>10 to 19 years-old                                                                                          | Health notifications<br><br>National population census                               | <b>Self-inflicted injury prevalence</b><br>☒ 2019 - 2021: <b>27.39%</b><br><br><b>Self-inflicted injury rates</b><br>☒ 2019: <b>133.1</b><br>☒ 2018: <b>84.2</b><br>☒ 2017: <b>59.1</b><br>☒ 2016: <b>32.8</b><br>☒ 2015: <b>15.3</b><br>☒ 2010: <b>4.7</b>               | <b>Self-inflicted injury rates (occurred at school)</b><br>☒ 2018: <b>2.75</b><br>☒ 2017: <b>1.77</b><br>☒ 2016: <b>0.51</b><br>☒ 2015: <b>0.29</b><br>☒ 2011: <b>0.09</b>                                               |
| 5        | Hospital Information System of the Brazilian National Health System (SIH/SUS)<br><br>The National Institute of Geography and Statistics (IBGE) | Public  | 2017 - 2022 | National system notifications<br>10 to 19 years-old                                                                                          | Hospitalization notifications (ICD-10: F10 or F19)<br><br>National population census | <b>Hospitalization rates</b> for mental and behavioral disorders due to alcohol or psychoactive substances<br>☒ 2022: <b>13.72</b><br>☒ 2021: <b>13.18</b><br>☒ 2020: <b>13.10</b>                                                                                        | <b>Hospitalization rates</b> for mental and behavioral disorders due to alcohol or psychoactive substances<br>☒ 2019: <b>17.77</b><br>☒ 2018: <b>17.53</b><br>☒ 2017: <b>16.18</b>                                       |
| 10       | 2019 National Adolescent School-based Health Survey (PeNSE) <sup>107</sup>                                                                     | Public  | 2019        | 159,245 adolescents<br>13 to 17 years-old<br><br>Students from 6 <sup>th</sup> primary to 3 <sup>rd</sup> secondary grade in 4361 public and | Questions adapted from the Global School Based Student Health Survey (GSHS)          | <b>VIOLENCE</b><br>☒ <b>Being bullied</b> (past month): 40%<br>☒ <b>Being bullied</b> twice or more (past month): 23%<br>☒ <b>Physical assault by parents/guardians</b> (past year): 21%                                                                                  | <b>SUBSTANCE USE</b><br>☒ <b>Alcohol use</b> (lifetime): 65.15%<br>☒ <b>Alcohol use - being drunk</b> (lifetime): 47%<br>☒ <b>Alcohol use</b> (past month): 27.7%<br>☒ <b>Tobacco use</b> (lifetime): 24.01%             |

|         |                                                                            |        |                                                                                                                                                                                                                                                          |                                                                             |                                                                                                                                                                                                                                                                                                                                                                                                                                                                                                                                                                                                                                                                                                                                                                                                                                                                                                                    |                                                                                                                                                                                                                                                                                                                                                                                                 |
|---------|----------------------------------------------------------------------------|--------|----------------------------------------------------------------------------------------------------------------------------------------------------------------------------------------------------------------------------------------------------------|-----------------------------------------------------------------------------|--------------------------------------------------------------------------------------------------------------------------------------------------------------------------------------------------------------------------------------------------------------------------------------------------------------------------------------------------------------------------------------------------------------------------------------------------------------------------------------------------------------------------------------------------------------------------------------------------------------------------------------------------------------------------------------------------------------------------------------------------------------------------------------------------------------------------------------------------------------------------------------------------------------------|-------------------------------------------------------------------------------------------------------------------------------------------------------------------------------------------------------------------------------------------------------------------------------------------------------------------------------------------------------------------------------------------------|
|         |                                                                            |        | private schools, urban and rural, including all state capitals                                                                                                                                                                                           |                                                                             | <input type="checkbox"/> <b>Sexual abuse</b> (lifetime): 14.6%<br><input type="checkbox"/> <b>Rape</b> (lifetime): 6.3%<br><input type="checkbox"/> <b>Physical assault not by parents/guardian</b> (past year): 12.2%<br><input type="checkbox"/> <b>Missed class due to insecurity in home-school route</b> (past month): 11.6%<br><input type="checkbox"/> <b>Missed class due to insecurity at school</b> (past month): 10.8%<br><input type="checkbox"/> <b>Involvement in a physical fight</b> (past month): 10.6%<br><input type="checkbox"/> <b>Involvement in a fight in which someone used a melee weapon</b> (past month): 4.8%<br><input type="checkbox"/> <b>Involvement in a fight in which someone used a firearm</b> (past month): 2.9%                                                                                                                                                            | <input type="checkbox"/> <b>E-cigarette use</b> (lifetime): 17.14%<br><input type="checkbox"/> <b>Illicit drug use</b> (lifetime): 14.3%<br><input type="checkbox"/> <b>Illicit drug use</b> (past month): 4.4% - 5.2%<br><input type="checkbox"/> <b>Tobacco use</b> (past month): 6.5%<br><br><b>WELLBEING</b><br><input type="checkbox"/> <b>Body image dissatisfaction</b> (present): 23.3% |
| 59, 1-1 | 2015 National Adolescent School-based Health Survey (PeNSE) <sup>114</sup> | Public | 2015<br><br>118,909 adolescents 13 to 17 years-old<br><br>Students from 6 <sup>th</sup> primary to 3 <sup>rd</sup> secondary grade in 3540 public and private schools, urban and rural, including all state capitals                                     | Questions adapted from the Global School Based Student Health Survey (GSHS) | <b>VIOLENCE</b><br><input type="checkbox"/> <b>Being bullied</b> rarely or sometimes (past month): 37.7%<br><input type="checkbox"/> <b>Practiced bullying</b> (past month): 19.8% - 22% (ages 13 to 15)<br><input type="checkbox"/> <b>Physical assault by parent/guardian</b> (past month): 14.5 - 16.2%<br><input type="checkbox"/> <b>Missed class due to insecurity in home-school route</b> (past month): 12.8%<br><input type="checkbox"/> <b>Missed class due to insecurity at school</b> (past month): 9.3%<br><input type="checkbox"/> <b>Involvement in a fight in which someone used a melee weapon</b> (past month): 8.2%<br><input type="checkbox"/> <b>Being bullied</b> most of the times to always (past month): 6.6%<br><input type="checkbox"/> <b>Involvement in a fight in which someone used a firearm</b> (past month): 5.6%<br><input type="checkbox"/> <b>Sexual abuse</b> (lifetime): 4% | <b>SUBSTANCE USE</b><br><input type="checkbox"/> <b>Alcohol use</b> (past month): 29.8%<br><input type="checkbox"/> <b>Tobacco use</b> (lifetime): 18.4%<br><input type="checkbox"/> <b>Tobacco use</b> (past month): 6.1% to 8%<br><br><b>WELLBEING</b><br><input type="checkbox"/> <b>Laxative misuse / self-induced vomiting</b> (lifetime): 6.9%                                            |
| 1-1     | 2012 National Adolescent School-based Health Survey (PeNSE) <sup>120</sup> | Public | 2012<br><br>109,104 adolescents<br><b>Age groups</b><br><ul style="list-style-type: none"> <li>● 13 to 15 years: 86%</li> <li>● ≥ 16 years: 13,2%</li> <li>● &lt; 13 years: 0.8%</li> </ul> 9 <sup>th</sup> primary grade students from 2,482 public and | Questions adapted from the Global School Based Student Health Survey (GSHS) | <b>VIOLENCE</b><br><input type="checkbox"/> <b>Practiced bullying</b> (past month): 20.8%<br><input type="checkbox"/> <b>Physical assault by parent/guardian</b> (past month): 11.6%<br><input type="checkbox"/> <b>Missed class due to insecurity in home-school route</b> (past month): 9.1%<br><input type="checkbox"/> <b>Involvement in a fight in which someone used a melee weapon</b> (past month): 8.3%                                                                                                                                                                                                                                                                                                                                                                                                                                                                                                   | <b>SUBSTANCE USE</b><br><input type="checkbox"/> <b>Illicit drug use</b> (lifetime): 7.3%<br><input type="checkbox"/> <b>Tobacco use</b> (past month): 5%                                                                                                                                                                                                                                       |

|                                                                         |        |             |                                                                                                                                                                                    |                                                                             |                                                                                                                                                                                                                                                                                                                                                                                          |                                                                                                                                                                                                                                 |
|-------------------------------------------------------------------------|--------|-------------|------------------------------------------------------------------------------------------------------------------------------------------------------------------------------------|-----------------------------------------------------------------------------|------------------------------------------------------------------------------------------------------------------------------------------------------------------------------------------------------------------------------------------------------------------------------------------------------------------------------------------------------------------------------------------|---------------------------------------------------------------------------------------------------------------------------------------------------------------------------------------------------------------------------------|
|                                                                         |        |             | private schools across all state capitals and other municipalities                                                                                                                 |                                                                             | <input type="checkbox"/> <b>Missed class due to insecurity at school</b> (past month): 8.0%<br><input type="checkbox"/> <b>Involvement in a fight in which someone used a firearm</b> (past month): 6.9%<br><input type="checkbox"/> <b>Being bullied</b> most of the times to always (past month): 7.2%                                                                                 |                                                                                                                                                                                                                                 |
| 2010 CEBRID study (Brazilian Center on Drug Information) <sup>126</sup> | Public | 2010        | 50,890 adolescents 10 to 18 years-old<br><br>Students from 789 public and private primary and secondary schools across all state capitals                                          | Questions adapted from the Global School Based Student Health Survey (GSHS) | <b>SUBSTANCE USE</b><br><input type="checkbox"/> <b>Alcohol use</b> (lifetime): 59.6%<br><input type="checkbox"/> <b>Binge drinking</b> (past year): 31.7% ( <i>ages 13 to 18</i> )<br><input type="checkbox"/> <b>Tobacco use</b> (lifetime): 25.2%<br><input type="checkbox"/> <b>Tobacco use</b> (past year): 15.3%<br><input type="checkbox"/> <b>Tobacco use</b> (past month): 8.6% | <b>SUBSTANCE USE</b><br><input type="checkbox"/> <b>Illicit drug use*</b> (lifetime): 5.2%<br><input type="checkbox"/> <b>Tranquilizers use (lifetime)</b> : 3.9%<br><input type="checkbox"/> <b>Crack use</b> (lifetime): 0.6% |
| Study of Cardiovascular Risks in Adolescents (ERICA) <sup>128</sup>     | Public | 2013 - 2014 | 85,000 adolescents 12 to 17 years-old<br><br>Students from 1,251 public and private schools in 273 municipalities with more than 100,000 inhabitants, including all state capitals | Items on alcohol consumption within structured questionnaire                | <b>SUBSTANCE USE</b><br><input type="checkbox"/> <b>Alcohol use</b> (past month): 21,2%                                                                                                                                                                                                                                                                                                  |                                                                                                                                                                                                                                 |

**Note:** the full dataset with 734 studies on 2576 prevalence estimates can be consulted in **Supplementary File 1**. \*Illicit drugs groups cannabis, cocaine/crack and ecstasy. **Abbreviations:** Centers for Disease Control and Prevention (CDC), International Classification of Diseases - 10<sup>th</sup> edition (ICD-10), Not Applicable (NA), World Health Organization (WHO).

**Table 3 - Assessment instruments for mental health: selection of 14 tools (positive validation reports on at least five psychometric properties)**

| INSTRUMENT                                                               | POPULATION           | SETTING            | RATER                 | ITEMS | TRANSLATION              | PSYCHOMETRICS <sup>1</sup> | REFERENCES |        |        |        |        |     |        |        |                                               |  |
|--------------------------------------------------------------------------|----------------------|--------------------|-----------------------|-------|--------------------------|----------------------------|------------|--------|--------|--------|--------|-----|--------|--------|-----------------------------------------------|--|
|                                                                          |                      |                    |                       |       | Translation              | C<br>C                     | C<br>R     | C<br>V | I<br>C | I<br>R | M<br>E | R   | S<br>V | T<br>R | References                                    |  |
| <b>DIAGNOSTIC INTERVIEWS FOR MENTAL DISORDERS</b>                        |                      |                    |                       |       |                          |                            |            |        |        |        |        |     |        |        |                                               |  |
| <b>DAWBA - Development and Wellbeing Assessment</b>                      | Children Adolescents | Clinical Community | Caregiver Clinician   |       | Valid <sup>79</sup>      | NA                         | +          | NA     | +      | +      | NA     | +   | +      | NA     | 43,79,1236                                    |  |
| <b>ADI-R - Autism Diagnostic Interview - Revised</b>                     | Children             | Clinical           | Caregiver             |       | Valid <sup>137</sup>     | NA                         | +          | +      | +      | +      | NA     | +/- | NA     | NA     | 137,141                                       |  |
| <b>SCREENING INSTRUMENTS FOR MENTAL DISORDERS</b>                        |                      |                    |                       |       |                          |                            |            |        |        |        |        |     |        |        |                                               |  |
| <b>SNAP-IV - Swanson, Nolan and Pelham Scale</b>                         | Children Adolescents | Clinical Community | Caregiver Teacher     | 18    | Valid <sup>141</sup>     | +/-                        | +          | +      | +      | +/-    | NA     | +/- | +/-    | NA     | 141,166                                       |  |
| <b>CBCL - Child Behavior Checklist</b>                                   | Children Adolescents | Clinical Community | Caregiver             | 118   | Valid <sup>164,165</sup> | NA                         | +/-        | +/-    | +/-    | NA     | ?      | +   | +/-    | +/-    | 67,142,151,152,165,166,67,131,145,216,167-200 |  |
| <b>SCARED - Screen for Child Anxiety Related Emotional Disorders</b>     | Children Adolescents | Clinical Community | Self-report           | 41    | Valid <sup>203</sup>     | NA                         | +          | +      | +/-    | -      | NA     | +   | +/-    | +/-    | 99,142,167,201,216                            |  |
| <b>MFQ - Mood and Feelings Questionnaire</b>                             | Adolescents          | School             | Caregiver             | 33    | Valid <sup>211</sup>     | NA                         | NA         | +      | +      | +      | NA     | NA  | +      | +      | 211,212                                       |  |
| <b>SCALES ON WELLBEING</b>                                               |                      |                    |                       |       |                          |                            |            |        |        |        |        |     |        |        |                                               |  |
| <b>PedsQL 4.0 - Pediatric Quality of Life Inventory</b>                  | Children Adolescents | Clinical Community | Caregiver Self-report | 23    | Valid <sup>216</sup>     | NA                         | NA         | +      | +/-    | +/-    | NA     | +   | +      | NA     | 216-222                                       |  |
| <b>BMSLSS - Brief Multidimensional Students' Life Satisfaction Scale</b> | Children Adolescents | School             | Self-report           | 6     | Uncertain                | +                          | NA         | +      | +/-    | +/-    | NA     | NA  | +      | NA     | 222-224                                       |  |
| <b>RSE - Rosenberg Self-Esteem Scale</b>                                 | Adolescents          | Clinical Community | Self-report           | 10    | Valid <sup>229</sup>     | NA                         | NA         | +      | +      | NA     | NA     | +   | +      | +/-    | 5,212,223                                     |  |
| <b>BESAA - Body Esteem Scale for Adolescents and Adults</b>              | Adolescents          | Community          | Self-report           | 23    | Valid <sup>238</sup>     | NA                         | NA         | +      | +      | NA     | NA     | +   | +      | +      | 238,239                                       |  |

medRxiv preprint doi: <https://doi.org/10.1101/2024.11.10.24317061>; this version posted November 13, 2024. The copyright holder for this preprint (which was not certified by peer review) is the author/funder, who has granted medRxiv a license to display the preprint in perpetuity. It is made available under a CC-BY-NC-ND 4.0 International license.

|                                                          |                      |          |                     |    |                             |           |           |           |           |           |           |          |           |           |                   |
|----------------------------------------------------------|----------------------|----------|---------------------|----|-----------------------------|-----------|-----------|-----------|-----------|-----------|-----------|----------|-----------|-----------|-------------------|
| <b>CSHQ</b> - Children's Sleep Habit Questionnaire       | Children             | Clinical | Caregiver           | 33 | <b>Valid</b> <sup>240</sup> | NA        | NA        | +/-       | +/-       | NA        | NA        | +        | +         | +         | 181,240-242       |
| <b>NEURODEVELOPMENTAL ASSESSMENT</b>                     |                      |          |                     |    | <b>Translation</b>          | <b>CC</b> | <b>CR</b> | <b>CV</b> | <b>IC</b> | <b>IR</b> | <b>ME</b> | <b>R</b> | <b>SV</b> | <b>TR</b> | <b>References</b> |
| <b>BSID</b> - Bayley Scales for Infant Development       | Infant               | Clinical | Health professional |    | <b>Valid</b> <sup>243</sup> | NA        | +         | +         | +/-       | NA        | NA        | +        | +         | +         | 243               |
| <b>SSRS-BR</b> - Social Skills Rating System             | Children             | School   | Self-report Teacher | 30 | <b>Valid</b> <sup>244</sup> | NA        | +         | +         | +/-       | NA        | NA        | NA       | +/-       | +/-       | 233,245-247       |
| <b>CHEXI</b> - Childhood Executive Functioning Inventory | Children Adolescents | School   | Health professional | 26 | <b>Valid</b> <sup>146</sup> | NA        | +         | +/-       | +         | +         | NA        | +/-      | ?         | NA        | 146,148, 248, 249 |

**Note:** the full dataset with 991 tools can be consulted in **Supplementary File 1**.<sup>1</sup> - “+” stands for a property with positive evidence for validation, “+/-” for mixed evidence, “-” for negative evidence, “?” for available evidence that cannot be classified as positive or negative, “NA” for non-available evidence (see *Supplementary Table 2*). **Abbreviations:** cross-cultural validity (CC), criterion validity (CR), construct validity (CV), internal consistency (IC), interrater reliability (IR), measurement error (ME), post-traumatic stress disorder (PTSD), responsiveness (R), structural validity (SV), test-retest reliability (TR).



**Table 4 - Interventions on mental health: selection of 35 studies (N > 100, randomized clinical trials)**

| INTERVENTION                                                                                                                                                                            | TARGET            | SAMPLE |                                                                                  |                       |           | OUTCOMES |                                                                                                                                                                  |     | FUNDING                                                                                                                              |
|-----------------------------------------------------------------------------------------------------------------------------------------------------------------------------------------|-------------------|--------|----------------------------------------------------------------------------------|-----------------------|-----------|----------|------------------------------------------------------------------------------------------------------------------------------------------------------------------|-----|--------------------------------------------------------------------------------------------------------------------------------------|
| SUBSTANCE USE PREVENTION                                                                                                                                                                |                   | N      | Description                                                                      | Age                   | Setting   | Effects  | Results                                                                                                                                                          | RoB | Agencies                                                                                                                             |
|                                                                                                                                                                                         |                   |        |                                                                                  |                       |           | 1        |                                                                                                                                                                  | 2   |                                                                                                                                      |
| <b>#TamoJunto program:</b> <sup>72,253-258</sup> psychoeducation classes based on European program Unplugged <sup>70</sup>                                                              | Drug use          | 6993   | Students in 72 public schools across 6 Brazilian cities                          | 12 - 17 years         | School    | -        | No effects on several drug use outcomes at 9- and 21-month follow-up. Harmful effects on alcohol initiation                                                      | M   | Public<br>Ministry of Health                                                                                                         |
| <b>#TamoJunto 2.0:</b> <sup>85,259,260</sup> revised version without harm components to address worsening effects on alcohol initiation                                                 | Drug use          | 5208   | Students in 73 public schools in Fortaleza (CE), Eusébio (CE) and São Paulo (SP) | 12 - 17 years         | School    | +/-      | Small reduction in alcohol use initiation but not in past-month use at 9-month. No changes on outcomes related to binge drinking, tobacco, marijuana, inhalants. | M   | Public<br>Ministry of Health                                                                                                         |
| <b>PROERD program</b> <sup>73,261-263</sup> (Drug and violence resistance educational program): awareness classes taught by police officers based on USA program DARE-KIR <sup>71</sup> | Drug use          | 5042   | Public school students in São Paulo (SP)                                         | 9 - 11 years          | School    | -        | No changes in drug use profiles. Increased intention to use cigarettes and accepting marijuana                                                                   | H   | Public<br>Ministry of Health, Security Agencies, FPE                                                                                 |
| Lectures and preventive interventions by teachers and experts <sup>264</sup>                                                                                                            | Drug use          | 1316   | Public school students in Guarulhos (SP)                                         | 15,5 ± 1,6 years      | School    | ?        | Effects in comparison with control group is was not reported                                                                                                     | H   | Public<br>CAPES                                                                                                                      |
| <b>Famílias Fortes</b> (“Strong Families”): <sup>265</sup> family activities and psychoeducation adapted from the Strengthening Families Program (SFP 10-14) <sup>266,267</sup>         | Drug use          | 805    | Families attending 50 Social Assistance Reference Centers from 12 municipalities | 12.6 □ ± □ 1.24 years | Community | +/-      | Short-term effects on parenting practices, but not on adolescent's drug use                                                                                      | L   | Public<br>Ministry of Women, Family and Human Rights                                                                                 |
| <b>PERAE program:</b> <sup>69</sup> psychoeducation on alcohol use and skill rehearsal adapted from Australian SHAHRP <sup>268</sup>                                                    | Drug use          | 348    | Private schools in São Paulo (SP)                                                | 12 - 14 years         | School    | -        | No differences in alcohol use<br>Increased knowledge about drugs                                                                                                 | H   | Public<br>CNPQ, FAPESP<br>Philanthropic<br>AFIP                                                                                      |
| CHILD DEVELOPMENT PROMOTION                                                                                                                                                             |                   | N      | Description                                                                      | Age                   | Setting   | Effects  | Results                                                                                                                                                          | RoB | Funding                                                                                                                              |
| <b>Programa Criança Feliz</b> <sup>269</sup> (“The Happy Child Program”): home visits to promote child development                                                                      | Child development | 3242   | Children from 30 cities listed at cash transfer programs                         | 0 - 11 months         | Community | -        | No effects on child development, maternal well-being, parent-child interactions, discipline, and psychological attributes                                        | H   | Public<br>Ministry of Social Development<br>Philanthropic<br>Itaú, Maria Cecília Vidigal Found.<br>International<br>World Bank, UNDP |
| Home visits to promote infants' sleep quality by focusing on environmental factors and education to parents <sup>270</sup>                                                              | Sleep quality     | 586    | Infants from the Pelotas Birth Cohort (RS) <sup>271</sup>                        | 3 months              | Community | -        | No differences in sleep quality                                                                                                                                  | H   | Public<br>CNPq                                                                                                                       |

|                                                                                                                                                                |                                                    |          |                                                                       |                 |                      |                            |                                                                                                                                                                                        |                        |                                                                                                                |
|----------------------------------------------------------------------------------------------------------------------------------------------------------------|----------------------------------------------------|----------|-----------------------------------------------------------------------|-----------------|----------------------|----------------------------|----------------------------------------------------------------------------------------------------------------------------------------------------------------------------------------|------------------------|----------------------------------------------------------------------------------------------------------------|
| <b>Nutritional counseling</b> <sup>134</sup> of mothers adapted from WHO'S integrated Management of Childhood Illness (IMCI) feeding guidelines <sup>272</sup> | Child development                                  | 424      | Infants assisted at public primary care units in Pelotas (RS)         | Up to 18 months | Primary Care         | -                          | No effects on intelligence scales or mental disorders at 15 to 16 years-old follow-up.                                                                                                 | H                      | <b>Public Nonprofits International WHO</b><br>CAPES, CNPq, FAPERJ                                              |
| Capoeira classes <sup>273</sup>                                                                                                                                | Child development                                  | 283      | Students from a public school in Rio de Janeiro (RJ)                  | 8 - 13 years    | School               | +/-                        | Significant improvements in eye-hand coordination, but not attention, intelligence, or academic achievement                                                                            | M                      | <b>Public</b><br>CAPES, CNPq, FAPERJ                                                                           |
| Adaptation <sup>274</sup> of APA's ACT Raising Safe Kids Parenting Program <sup>275</sup>                                                                      | Child development Parenting                        | 247      | Mothers of children from high-risk families                           | 6 - 24 months   | Community            | NA                         | Only evaluates attendance and satisfaction, but not final outcomes                                                                                                                     | H                      | <b>Public International</b><br>CAPES, GCRF, UKRI, Wellcome Trust, Found. Bernard                               |
| Adaptation <sup>276,277</sup> of APA's ACT Raising Safe Kids Parenting Program <sup>275</sup>                                                                  | Child development Parenting                        | 143      | Mothers of children living in Ribeirão Preto (SP)                     | 3 - 8 years     | Primary care Schools | +                          | Improvements in parenting practices and child behavior maintained at 4-month follow-up                                                                                                 | H                      | <b>Public Philanthropic International</b><br>CAPES, CNPq, FAPERJ, FAEPA, USP, Maria Cecília Vidigal Found. APA |
| <b>MENTAL HEALTH PROMOTION &amp; PREVENTION</b>                                                                                                                |                                                    | <b>N</b> | <b>Description</b>                                                    | <b>Age</b>      | <b>Setting</b>       | <b>Effects<sub>1</sub></b> | <b>Results</b>                                                                                                                                                                         | <b>RoB<sub>2</sub></b> | <b>Funding</b>                                                                                                 |
| Chatbot-delivered microinterventions <sup>239</sup>                                                                                                            | Body Image                                         | 2616     | Geographically-diverse adolescents recruited with research panels     | 13 - 18 years   | Online               | +                          | Small effects in body satisfaction scale                                                                                                                                               | H                      | <b>Private funding</b>                                                                                         |
| <b>Elos 2.0 Program:</b> <sup>278</sup> classroom behavior management activities based on the Good Behavior Game (GBG) <sup>279,280</sup>                      | Behavior Concentration                             | 2030     | Twenty-two schools in Fortaleza (CE), Eusébio (CE) and São Paulo (SP) | 6 - 10 years    | School               | +                          | Improved prosocial and concentration skills at 2-5 month follow-up<br>Reduction in disruptive behavior                                                                                 | L                      | <b>Public</b><br>Ministry of Health                                                                            |
| <b>Movimente Program:</b> <sup>281</sup> Teacher training, environmental improvements, and education strategies for physical activity and healthy nutrition    | Quality of life                                    | 1427     | School students in Florianopolis (SC)                                 | 10 - 16 years   | School               | -                          | No effects on health-related quality of life (HRQoL)                                                                                                                                   | H                      | <b>Public</b><br>CAPES, CNPQ                                                                                   |
| <b>SACODE project:</b> <sup>282</sup> doubling physical education classes and/or workshop with physical education teachers                                     | Depressive symptoms Social isolation Sleep quality | 1296     | High school students in Recife (PE)                                   | 14-19 years     | School               | +/-                        | Workshop with the teachers decreased adolescents' depressive symptoms, social isolation, and poor sleep quality.<br>Combined intervention or doubling classes did not change outcomes. | H                      | <b>Public</b><br>CAPES, CNPQ, FAPERJ                                                                           |
| <b>Fortaleza Sua Saúde project:</b> <sup>283</sup> teacher's training, improving opportunities for activities in the school environment, and health education  | Healthy lifestyle                                  | 1272     | Public schools in Fortaleza (CE)                                      | 11 - 18 years   | School               | +/-                        | Adolescents were more likely to practice physical activity<br>No changes in screen use, healthy eating, or alcohol/tobacco use.                                                        | H                      | <b>Public</b><br>Ministry of Health, Ministry of Education                                                     |

|                                                                                                                                                             |                                             |          |                                                                                       |                    |                |                            |                                                                                                                                                                 |                        |                                                      |
|-------------------------------------------------------------------------------------------------------------------------------------------------------------|---------------------------------------------|----------|---------------------------------------------------------------------------------------|--------------------|----------------|----------------------------|-----------------------------------------------------------------------------------------------------------------------------------------------------------------|------------------------|------------------------------------------------------|
| <b>H3G-Brazil:</b> <sup>284</sup> program with nutrition, physical activity, and disordered eating components based on Australian NEAT girls <sup>285</sup> | Obesity<br>Disordered eating                | 253      | Girls from high schools in São Paulo (SP)                                             | 14 - 18 years      | School         | +/-                        | Worsened unhealthy weight control behaviors at 6-month follow-up<br>Improved healthy eating strategies                                                          | H                      | <b>Public</b><br>CAPES, FAPESP                       |
| <b>The Body in Question:</b> <sup>286</sup> group sessions focusing on cognitive dissonance adapted from the "Body Project" <sup>287</sup>                  | Disordered eating                           | 141      | Girls with body image concerns from a high school in the state of Minas Gerais (MG)   | 16.25 +- 1.4 years | School         | +/-                        | No effects on disordered eating attitudes and eating disorder symptoms<br>Benefits on body satisfaction and media influence.                                    | H                      | <b>Public</b><br>CNPq, IF Sudeste MG                 |
| Massage Groups & Storytelling Groups <sup>288</sup>                                                                                                         | Aggressive behavior<br>Academic performance | 105      | Students from a public elementary school in São Paulo (SP)                            | 6.5 - 8.1 years    | School         | +                          | Massage and storytelling groups slightly decreased aggressive behavior                                                                                          | H                      | <b>Public</b><br>FAPESP                              |
| <b>TREATMENT OF MENTAL DISORDERS</b>                                                                                                                        |                                             | <b>N</b> | <b>Description</b>                                                                    | <b>Age</b>         | <b>Setting</b> | <b>Effects<sup>1</sup></b> | <b>Results</b>                                                                                                                                                  | <b>RoB<sup>2</sup></b> | <b>Funding</b>                                       |
| A physical activity program <sup>289</sup>                                                                                                                  | ASD symptoms                                | 229      | Children and adolescents with ASD from pediatric centers in Maceió (AL)               | 2 - 17 years       | Clinical       | +/-                        | Improved social interaction, reactivity, sleep disturbance<br>No changes on eye contact, attention, and food selectivity.                                       | H                      | <b>Public</b><br>CAPES, CNPq, Ministério da Educação |
| Single or combined interventions consisting of: <sup>290</sup> a) Methylphenidate b) Behavioral parent training and c) Educational intervention             | ADHD symptoms                               | 153      | Preschool children with ADHD from an outpatient clinic in São Paulo (SP)              | 3 - 5 years        | Clinical       | +                          | Methylphenidate had benefits on symptoms and functionality<br>Behavioral parent training was superior to the educational intervention group in functionality.   | L                      | <b>Public</b><br>CNPq, FAPESP                        |
| Virtual and real tasks for motor and cognitive development <sup>291</sup>                                                                                   | ASD development                             | 100      | Students with ASD and with typical development from a public school in São Paulo (SP) | 8 - 16 years       | School         | NA                         | Practice in the virtual task led to more errors, but increased subsequent performance in real tasks.<br>Improvements were more pronounced in children with ASD. | H                      | <b>Public</b><br>CAPES, CNPq, FAPESP                 |
| Group therapy on problem-solving skills <sup>292</sup> adapted from Vázquez (2015) <sup>293</sup>                                                           | Suicidality                                 | 100      | High-risk students from public schools in Fortaleza (CE)                              | 15 - 19 years      | School         | +                          | Lower suicidal orientation and suicidal risk at 6-month follow-up                                                                                               | H                      | <b>Public</b><br>FUNECE                              |

**Note:** the full dataset with 192 studies on 173 trials can be consulted in **Supplementary File 1**. <sup>1</sup>**Effects:** + (positive outcomes), +/- (partial effects), - (lack of positive outcomes), ? (Uncertain), NA (final outcome was not tested). <sup>2</sup>**Risk of Bias:** H (High), L (Low), M (Moderate). **Abbreviations:** **ADHD** (Attention Deficit Hyperactivity Disorder); **AFIP** (Associação Fundo de Incentivo à Pesquisa - *Association for Research Incentive Fund*); **APA** (American Psychological Association); **ASD** (Autism Spectrum Disorder); **CAPES** (Coordenação de Aperfeiçoamento de Pessoal de Nível Superior - *Coordination for the Improvement of Higher Education Personnel*); **CNPQ** (Conselho Nacional de Desenvolvimento Científico e Tecnológico - *National Council for Scientific and Technological Development*); **DARE** (Drug Abuse Resistance Education); **FACEPE** (Fundação de Amparo à Ciência e Tecnologia do Estado de Pernambuco - *Foundation for the Support of Science and Technology of the State of Pernambuco*); **FAEPA** (Fundação de Apoio ao Ensino, Pesquisa e Assistência do Hospital das Clínicas da Faculdade de Medicina de Ribeirão Preto da Universidade de São Paulo - *Foundation for the Support of Teaching, Research, and Assistance of the Hospital das Clínicas of the Faculty of Medicine of Ribeirão Preto of the University of São Paulo*);

**FAPERGS** (Fundação de Amparo à Pesquisa do Estado do Rio Grande do Sul - *Foundation for the Support of Research in the State of Rio Grande do Sul*); **FAPESP** (Fundação de Amparo à Pesquisa do Estado de São Paulo - *Foundation for the Support of Research in the State of São Paulo*); **FUNECE** (Fundação Universidade Estadual do Ceará); **GCRF** (Global Challenges Research Fund); **IF Sudeste MG** (Instituto Federal do Sudeste de Minas Gerais - *Federal Institute of the Southeast of Minas Gerais*); **UKRI** (United Kingdom Research and Innovation); **UNDP** (United Nations Development Program); **WHO** (World Health Organization)
